1 **Characterization of the single *FERONIA* homolog in *Marchantia***  
2 ***polymorpha* reveals an ancestral role of CrRLK1L receptor kinases**  
3 **in regulating cell expansion and morphological integrity**

4 Martin A. Mecchia<sup>1#</sup>, Moritz Rövekamp<sup>1#+</sup>, Alejandro Giraldo-Fonseca<sup>1</sup>, Dario Meier<sup>1</sup>,  
5 Philippe Gadiant<sup>1</sup>, John L. Bowman<sup>2</sup>, and Ueli Grossniklaus<sup>1\*</sup>

6 <sup>1</sup>Department of Plant and Microbial Biology and Zurich-Basel Plant Science Center, University of  
7 Zurich, 8008 Zurich, Switzerland

8 <sup>2</sup>School of Biological Sciences, Monash University, Clayton, Melbourne, Victoria 3800, Australia

9 <sup>+</sup> Current Affiliation: Department of Aquatic Ecology, EAWAG, 8600 Duebendorf, Switzerland

10

11 # These authors contributed equally to the manuscript.

12 \*Author for correspondence: grossnik@botinst.uzh.ch

13

14

15

16

17

18

19

20

21

22

23

24

25 **Short title: Deciphering the ancestral role of CrRLK1L receptors in land plants**

## 26 **Summary**

27 Plant cells are surrounded by a cell wall, a rigid structure rich in polysaccharides and  
28 glycoproteins. The cell wall is not only important for cell and organ shape, but crucial for  
29 intercellular communication, plant-microbe interactions, and as a barrier to the  
30 environment. In the flowering plant *Arabidopsis thaliana*, the 17 members of the  
31 *Catharanthus roseus* RLK1-like (*CrRLK1L*) receptor kinase subfamily are involved in a  
32 multitude of physiological and developmental processes involving the cell wall, including  
33 reproduction, hormone signaling, cell expansion, innate immunity, and various stress  
34 responses. Due to genetic redundancy and the fact that individual *CrRLK1Ls* can have  
35 distinct and sometimes opposing functions, it is difficult to assess the primary or ancestral  
36 function of *CrRLK1Ls*. To reduce genetic complexity, we characterized the single  
37 *CrRLK1L* gene of *Marchantia polymorpha*, *MpFERONIA* (*MpFER*). Plants with reduced  
38 *MpFER* levels show defects in vegetative development, i.e., rhizoid formation and cell  
39 expansion, but also affect male fertility. In contrast, *Mpfer* null mutants and  
40 overexpression lines severely affect cell integrity and morphogenesis of the gametophyte.  
41 Thus, the *CrRLK1L* gene family originated from a single gene with an ancestral function  
42 in cell expansion and the maintenance of cellular integrity. During land plant evolution,  
43 this ancestral gene diversified and was recruited to fulfil a multitude of specialized  
44 physiological and developmental and roles in the formation of both gametophytic and  
45 sporophytic structures essential to the life cycle of flowering plants.

46

## 47 **Key Words**

48 cell wall integrity, cell elongation, *CrRLK1L* receptor kinases, *Marchantia polymorpha*,  
49 signaling pathway evolution

## 50 Introduction

51 The functioning of plant cells is contingent upon the cell wall acting as a barrier between  
52 the cell and its environment. This complex matrix of polysaccharides, glycoproteins, and  
53 other organic compounds defines the growth and shape of a cell and provides protection  
54 against biotic and abiotic stresses [1,2]. Moreover, its stiffness has to resist turgor  
55 pressure while also allowing cell expansion during growth. Thus, sensing and controlling  
56 cell wall integrity (CWI) is crucial for plant cells and receptor kinases (RKs) play an  
57 important role in sensing extracellular cues that activate intracellular pathways. Different  
58 RK subfamilies are defined by their extracellular domain (ECD), which is more variable  
59 than their transmembrane and kinase domains [3]. Over the last decade, the *CrRLK1L*  
60 subfamily emerged as important CWI sensors [4,5].

61 Functions have been assigned to 15 of the 17 *CrRLK1L* members encoded in the *A.*  
62 *thaliana* genome: they are required for cell elongation and cell shape, sensing  
63 environmental cues, and cell-cell communication in diverse contexts [6–22]. For instance,  
64 *FERONIA* (*AtFER*), *THESEUS1* (*AtTHE1*), *HERCULES1* (*AtHERK1*), and *AtHERK2* are  
65 required for cell elongation as *Atfer* single, *Atthe1Atherk1* double, and  
66 *Atthe1Atherk1Atherk2* triple mutants exhibit stunted growth [7,9–11]. Root hairs burst in  
67 mutants affecting *AtFER* and *[Ca<sup>2+</sup>]<sub>cyt</sub>-ASSOCIATED PROTEIN KINASE1*  
68 (*AtCAP1*)/*ERULUS* (*AtERU*) [12,16]. Moreover, *AtFER* plays a role in powdery mildew  
69 resistance [11], innate immunity [15,22], calcium signaling [23], phytohormone signaling  
70 [10,24–26], and mechano- and heavy metal sensing [20,27]. In most contexts, the  
71 *CrRLK1L*s tend to promote cellular growth and cell elongation. In contrast, *AtTHE1*  
72 actively inhibits cell elongation in hypocotyls when cell wall perturbations occur, *e.g.*, due  
73 to mutations in the cell wall biosynthesis machinery or upon treatment with isoxaben, a  
74 cellulose synthesis inhibitor [7,28].

75 In addition to regulating cellular growth during the vegetative phase of the life cycle,  
76 several *CrRLK1*Ls play a role during fertilization by controlling the growth and reception  
77 of the pollen tube. In the female gametophyte, *AtFER* is highly expressed in the two  
78 synergid cells that flank the egg cell and are important for double fertilization [6,29].  
79 *AtFER* is crucial for pollen tube reception and the release of the two sperm cells  
80 [6,10,23,30,31], a process also involving two other, redundantly acting synergid-  
81 expressed *CrRLK1*Ls, *AtHERK1* and *ANJEA* (*AtANJ*) [17]. In contrast to these synergid-  
82 expressed *CrRLK1*Ls, four pollen-expressed *CrRLK1*Ls, named *ANXUR1* (*AtANX1*),  
83 *AtANX2*, *BUDDHA'S PAPER SEAL1* (*AtBUPS1*) and *AtBUPS2* [8,14,18,32], are  
84 redundantly required for pollen tube integrity and tip growth.

85 To transduce extracellular cues, *CrRLK1*Ls bind secreted peptides of the RAPID  
86 ALKALINIZATION FACTOR (RALF) family [22,32–35], which induce complex formation  
87 with members of LORELEI (LRE) family of GPI-anchored proteins [32,35–37]. Hence, it  
88 was suggested that at least some *CrRLK1*Ls act as CWI sensors that coordinate cell  
89 elongation in response to changes in the cell wall [38–43].

90 The 17 *A. thaliana* *CrRLK1*Ls act partially redundantly and can have opposite effects on  
91 cellular growth (reviewed in [19,41,43,44]). To investigate the original function of  
92 *CrRLK1*Ls, we characterized them in a system with reduced genetic complexity: the  
93 liverwort *Marchantia polymorpha* encodes a single *CrRLK1*L [45,46]. Liverworts represent  
94 an early diverging land plant lineage and have been hypothesized to retain, at least in  
95 part, characteristics of the earliest land plants [45,47–52]. The presence of similar types  
96 of gene families in all plant lineages suggests that the differences in development evolved  
97 by co-opting and modifying existing developmental programs and genetic networks,  
98 rather than through the evolution of novel genes [47,48,53]. *M. polymorpha* is thus an

99 ideal system to study the ancestral role of genes and how it was modulated and diversified  
100 during land plant evolution [45,54,55].

101 We refer to the a single *CrRLK1L* family member encoded in the *M. polymorpha* genome,  
102 Mp4g15890 (Mapoly0869s0001), as Mp*FERONIA* (Mp*FER*) (aka Mp*THESEUS*, Mp*THE*)  
103 [44–46,56]. An Mp*fer/the* mutant was identified in a large T-DNA screen for defective  
104 rhizoid formation, developing short and irregularly shaped rhizoids with brown tips,  
105 indicating rhizoid rupture [56]. In the same screen, a mutant affecting the ortholog of the  
106 *A. thaliana* receptor-like cytoplasmic kinase *MARIS* (*AtMRI*), known to act downstream of  
107 *AtFER*, was identified with a similar phenotype (named Mpmri aka Mppti, Mp7g17560  
108 [Mapoly0051s0094]) [56,57]. As in *A. thaliana*, a dominant active version of Mp*MRI* can  
109 partially rescue the Mp*fer* rhizoid phenotype [57]. This suggests that at least some of the  
110 machinery associated with cell elongation and CWI sensing is conserved between *A.*  
111 *thaliana* and *M. polymorpha*.

112 Here, we report that *CrRLK1L* function is required in a variety of aspects of *M. polymorpha*  
113 gametophyte development. Phylogenetic analyses suggest that *CrRLK1L* genes first  
114 appeared in the common ancestor of land plants. The characterization of lines with  
115 reduced Mp*FER* levels indicates that, in addition to its function in rhizoid formation,  
116 Mp*FER* controls cell size and organ growth and is involved in male gametogenesis and  
117 fertility. Analysis of the Mp*FER* expression pattern points to an involvement in female  
118 sexual organogenesis and sporophyte development. Our data suggests that the broad  
119 involvement of *CrRLK1L* function in the development and physiology of land plants is an  
120 ancestral and conserved characteristic, although the functions of *CrRLK1L*s were  
121 extended and adapted to control additional developmental processes in the sporophyte  
122 in the course of land plant evolution.

123

## 124 **Results**

### 125 **CrRLK1L is conserved in land plants and arose in this lineage**

126 The *M. polymorpha* genome encodes a single CrRLK1L homolog (Mp4g15890  
127 [Mapoly0869s0001]) [44–46]. Like other CrRLK1L members, this gene encodes an  
128 intracellular serine/threonine kinase domain, a transmembrane domain, and an  
129 extracellular malectin-like domain with two malectin domains (Figure 1A). Given that the  
130 ECD of CrRLK1Ls in *A. thaliana* is crucial for their function and, in contrast to the kinase  
131 domain, not interchangeable [58], we performed a phylogenetic analysis with the amino  
132 acid sequences of the predicted malectin-like domain of Mp4g15890, the five members  
133 of the moss *Physcomitrella patens*, the two of the lycophyte *Selaginella moellendorffii*,  
134 and the 17 CrRLK1Ls of *A. thaliana* (Figure 1B). The *M. polymorpha* CrRLK1L member  
135 grouped together with the CrRLK1Ls of basal land plants and was in the same clade as  
136 AtFER, while AtTHE1 was in a different one (Figure 1B). Based on this phylogenetic  
137 position and the fact that the malectin-like domain of the *M. polymorpha* CrRLK1L shared  
138 the highest amino acid identity with AtFER (Figure S1A), we named it MpFER [45,46,57],  
139 but it is also known as MpTHE [56].

140 Interestingly, no significant similarity to the MpFER malectin-like domain was found when  
141 compared to available genomic data of six Chlorophyte algae (*Chlamydomonas*  
142 *reinhardtii*, *Dunaliella salina*, *Volvox carteri*, *Coccomyxa subellipsoidea*, *Micromonas*  
143 *pusilla*, *Ostreococcus lucimarinus*) and expression data of six Charophycean algae  
144 (*Klebsormidium nitens*, *Nitella mirabilis*, *Coleochaete orbicularis*, *Spirogyra pratensis*,  
145 *Mesostigma viride*, *Closterium peracerosum–strigosum–littorale* complex). In *Closterium*  
146 complex, an RK named CpRLK1 expressed during sexual reproduction was suggested  
147 to be a CrRLK1L homolog [59]. However, comparing the full sequence or the ECD of  
148 CpRLK1 with the predicted *M. polymorpha* proteome, higher identity to another RK was

149 found (Figures S1B and S1C). Moreover, no RALF orthologs have been reported in algae,  
150 suggesting the origin of the *CrRLK1L* pathway in land plants [45].

151 To further support MpFER as a member of the *CrRLK1L* subfamily, the three-dimensional  
152 structure of its ECD was modelled [60] using the structure of the AtFER ECD (PDB  
153 6a5b.1A, [35]) as a template (Figure 1C). Overall, the predicted structure of the MpFER  
154 ECD is highly similar to that of AtFER, keeping an almost identical number of secondary  
155 structures (7 alpha-helices and 33 beta-sheets in the MpFER ECD [35] and 8 alpha-helix  
156 and 34 beta-sheets in the AtFER ECD, respectively), and a similar spatial disposition for  
157 32 of the beta-sheet structures and 6 of the alpha-helices (Figure 1C). When comparing  
158 the structural superposition of the AtFER and MpFER ECDs (Figures 1D and S1D), we  
159 observed that most conserved parts of the malectin-like domain are in the core of the  
160 protein, while the more variable parts are located peripherally. Moreover, the 3D structure  
161 of the CpRLK1 ECD could not be properly modelled using the AtFER ECD (Figures S1D  
162 and S1E). Taken together, these results suggest that the malectin-like domain of MpFER  
163 could interact with similar proteins as AtFER does in *A. thaliana*, and may thus be involved  
164 in similar pathways. Sequence comparison of the MpFER kinase domain showed a  
165 conservation of the activation loop and a Lys important for catalytic activity (Figure 1E).  
166 Furthermore, several determined phosphorylation sites found in AtFER, AtERU, and  
167 *CrRLK1* were conserved in MpFER (Figure 1E) [13,33,61,62]. Thus, we propose MpFER  
168 to be basal and orthologous to all other land plant *CrRLK1L*s, and that the *CrRLK1L* family  
169 arose as plants conquered land.

170

### 171 **MpFER is broadly expressed throughout the *M. polymorpha* life cycle**

172 In *A. thaliana*, the expression patterns of the 17 *CrRLK1L* members span vegetative and  
173 reproductive stages and both generations of the life cycle (reviewed in [43]), pointing to

174 the importance of *CrRLK1Ls* for basic cellular functions. To assess whether this pattern  
175 is reflected in the land plant with the most ancestral characteristics, a promoter fragment  
176 of 3.2 kb (*proMpFER*) was used to drive expression of a triple yellow fluorescent protein  
177 (*trpVNS*) with a nuclear localization signal (*proMpFER:trpVNS*) and transformed into *M.*  
178 *polymorpha* sporelings. All transformants expressing the *trpVNS* fluorescent protein (45  
179 of 48 independent lines) exhibited an indistinguishable expression pattern (Figure 2).  
180 During vegetative stages of gametophyte development, expression was observed in most  
181 cells of the thallus (Figure 2A). In concordance with the importance of *MpFER* for rhizoids  
182 [56], high *trpVNS* expression was observed in these tip-growing cells (Figure 2B). While  
183 *trpVNS* was expressed in gemma cups, no expression was observed in mature gemmae,  
184 possibly due to their dormancy (Figure 2C).  
185 In mature female sexual organs, strong expression was observed in the entire  
186 archegoniophore (Figure 2D). The archegonia expressed *trpVNS* in most cells, except for  
187 the egg cell (Figure 2E). However, after fertilization, *proMpFER:trpVNS* became active in  
188 the zygote (Figure 2F). Inside the sporogonium, the sporogenous cells and subsequently  
189 the developing spores, but not the elater cells, strongly expressed *trpVNS* (Figure 2I). In  
190 male sexual organs, *trpVNS* was broadly detected in the antheridial splash platform  
191 (Figure 2G) and, specifically, in the spermatogenous tissue of the antheridia and the non-  
192 reproductive jacket cells surrounding them at different developmental stages (Figure 2H).  
193 Taken together, *MpFER* is expressed in most tissues during vegetative stages of  
194 gametophyte development as well as in the antheridia and archegonia during the sexual  
195 reproduction. Interestingly, the *proMpFER* promoter is not active in mature gemmae and  
196 the unfertilized, quiescent egg cell, although expression is initiated after dormancy and in  
197 the zygote. In concordance with the collectively ubiquitous expression of *CrRLK1Ls* in *A.*



198 *thaliana*, the MpFER expression pattern reinforces the importance of this family for basic  
199 cellular functions in land plants.

200

### 201 **MpFER controls cell expansion during vegetative gametophyte development**

202 To analyze the function of MpFER, three independent artificial microRNA constructs  
203 targeting MpFER were designed (amiR-MpFER), based on the endogenous microRNA  
204 MpmiR160 (Figure S2, [63]) and driven by the ubiquitous *pro*MpEF1 promoter [64]. While  
205 amiR-MpFER1 and amiR-MpFER2 target sites in the ECD coding sequence, amiR-  
206 MpFER3 targets the sequence encoding the kinase domain (Figures 3A and 3B). For  
207 each amiR-MpFER construct, several independent transgenic lines were obtained that  
208 showed a reduction in thallus size (Figures 3C, 3D and S3A). MpFER levels were  
209 quantified by qRT-PCR in two independent amiR-MpFER2 and amiR-MpFER3 lines  
210 each, which showed a similar phenotype (Figure 3E). MpFER expression ranged from  
211 10% to 20% of the wild-type level in all amiR-MpFER lines analyzed (Figure 3E).

212 Previously, the T-DNA insertion mutant *Mpfer-1* was identified in a screen for mutants  
213 with defective rhizoids ([56], referred to as *Mpthe*). As the T-DNA inserted into the 3' UTR  
214 of the MpFER gene (Figure 3A; [56]), MpFER expression was analyzed by qRT-PCR but  
215 it showed no reduction compared to the wild type (Figure 3F), suggesting that the T-DNA  
216 insertion does not affect MpFER transcription. However, thallus size of *Mpfer-1* mutants  
217 is similar to that of amiR-MpFER lines (Figures 3C and 3D), suggesting that MpFER  
218 function is partially affected by the T-DNA insertion.

219 Rhizoids are tip-growing cells analogous to the root hairs in flowering plants  
220 (angiosperms). Reduced MpFER activity strongly impaired rhizoid formation and the  
221 rhizoids collapsed (Figure 3C). This had also been reported for the *Mpfer-1* mutant [56]  
222 and is in concordance with the function of AtFER and AtANX1/2 in tip-growing root hairs

223 [12,16,33,65] and pollen tubes [8,14], respectively. As *CrRLK1L* members are important  
224 for cell expansion in angiosperms [7,9,11,19,34,66,67], cell size of epidermal thallus cells  
225 in fully differentiated regions with minimal growth was measured in *Mpfer-1* and amiR-  
226 *MpFER* lines, showing a reduction in cell area as compared to the wild type (Figures 3G,  
227 S3B and S3C). Although amiR-*MpFER* lines produced more intact rhizoids than *Mpfer-1*  
228 mutants (Figure 3C), the average epidermal cell area was similarly reduced, although the  
229 distribution of cell areas differed between amiR-*MpFER* lines and *Mpfer-1* (Figures 3G,  
230 S3B and S3C).

231 In conclusion, *MpFER* has a fundamental role in rhizoid formation and growth during  
232 vegetative development. These results suggest an ancestral and conserved function of  
233 the *CrRLK1L*s in polar cell growth and cell expansion.

234

### 235 ***MpFER* is important for the morphological integrity of the gametophyte**

236 Given that *Mpfer-1* and amiR-*MpFER* lines retain some *MpFER* activity, we generated  
237 *Mpfer* knock-out mutants with the goal to unveil potentially hidden *CrRLK1L* functions by  
238 generating a plant without any *CrRLK1L* activity. Using CRISPR/Cas9, two sites in the  
239 ECD-coding sequence of *MpFER* were targeted (Figure 4A). At least 10 independent  
240 lines were selected and analyzed for each target site. All plants with severely affected  
241 thallus development contained a frame shift mutation at the respective target site (Figures  
242 4A-4C) while *MpFER* was not affected in transgenic plants with normal development.

243 The thallus area of the newly generated, amorphic knock-out mutants was more strongly  
244 reduced compared to *Mpfer-1* [56], confirming that, like the amiR-*MpFER* lines, *Mpfer-1*  
245 is a hypomorphic mutant (Figures 4C and 4D). In contrast, rhizoid integrity was similarly  
246 affected in hypo- and amorphic *Mpfer* alleles, suggesting that rhizoid formation is more  
247 sensitive to reduced *MpFER* activity than thallus growth (Figures 4E-4F). Despite of the

248 strong impact on thallus development, both hypo- and amorphic *Mpfer* mutants form  
249 gemma cups.

250 The strong disruption of thallus growth in amorphic *Mpfer* mutants prompted us to  
251 investigate whether cells of the thallus died in the absence of *MpFER* activity. Indeed,  
252 using trypan blue staining, we detected dead cells in these mutants, indicating a loss of  
253 morphological integrity (Figure 4G).

254

255 **Some reproductive but not all CWI sensing functions of *CrRLK1Ls* are conserved**  
256 **in land plants**

257 In *A. thaliana*, at least seven *CrRLK1L* family members play a role in reproduction, with  
258 *AtANX1/2* and *AtBUPS1/2* being important for pollen tube growth [8,14,18,32] and  
259 *AtFER*, *AtHERK1*, and *AtANJ* for pollen tube reception by the synergid cells [6,17]. To  
260 characterize the function of *MpFER* in reproductive development, amiR-*MpFER3-2* lines  
261 were transferred to sexual organ-inducing conditions [68]. The number of  
262 antheridiophores produced was significantly less in amiR-*MpFER* lines compared to the  
263 wild type (Figures 5A and S3D) and the antheridiophore splash platforms were also  
264 smaller (Figure 5B). The reduction in *MpFER* expression in antheridiophores of amiR-  
265 *MpFER* lines was confirmed by qRT-PCR and results were comparable to those using  
266 thallus tissue (Figure 5C). A pronounced reduction in spermatogenous tissue was  
267 observed in many antheridia isolated from amiR-*MpFER3-2* lines (Figures 5D and 5E).  
268 However, although the plants were grown under optimal conditions in axenic culture  
269 boxes, the effects on reproductive structures could be partly indirect due to the reduction  
270 in plant size and/or rhizoid function.

271 To determine male fertility of these amiR-*MpFER* lines with reduced spermatogenous  
272 tissue, we performed crosses with wild-type female plants. The spermatocyte

273 concentration harvested from wild-type antheridia was almost 3-fold higher than from  
274 amiR-MpFER lines and was adjusted using a hemocytometer. In just one of the crosses  
275 (n=20), a single sporophyte was formed, resulting in  $0.05 \pm 0.05$  (mean  $\pm$  SE) sporophytes  
276 per archegoniophore, whereas the same females crossed with wild-type males yielded  
277  $9.95 \pm 2.33$  (mean  $\pm$  SE) sporophytes per archegoniophore. In summary, MpFER plays  
278 a role in antheridiophore development and spermatocytes of plants with reduced MpFER  
279 activity are poorly fertile. Thus, CrRLK1Ls have a conserved role in reproduction in  
280 addition to their role in cell expansion and integrity during vegetative development.  
281 Some *A. thaliana* CrRLK1Ls are involved in surveying CWI and in inhibiting growth when  
282 CWI is impaired. Cell wall defects caused either by mutations affecting cellulose  
283 biosynthesis or by treatment with isoxaben, a cellulose synthesis inhibitor, can be  
284 suppressed by a mutation in *AtTHE1* [7,28]. To investigate whether MpFER also acts as  
285 CWI sensor, we treated wild-type, *Mpfer*, and amiR-MpFER3-2 gemmae with isoxaben  
286 (Figure 5F). As in the wild type, isoxaben affected the development of gemmae with  
287 reduced MpFER activity, all growing progressively less with increasing isoxaben  
288 concentration (Figure 5F). These results suggest that the function of *AtTHE1* in  
289 repressing cellular growth when CWI is impaired appeared later in the course of land  
290 plant evolution or was lost in the *Marchantia* lineage.

291

## 292 **The CrRLK1L signaling pathway is conserved in land plants**

293 As downregulation of MpFER or AtFER produce similar phenotypes concerning polarized  
294 growth and cell expansion in *M. polymorpha* and *A. thaliana*, respectively, interspecific  
295 complementation was attempted. First, the coding sequence of MpFER fused to the  
296 Green Fluorescent Protein (GFP) gene under the control of the viral 35S promoter  
297 (*pro35S:MpFER-GFP*) was transformed into heterozygous *Atfer-2* mutants. Then, GFP

298 expression at the cell periphery and complementation of the bursting root hair and  
299 reduced rosette size phenotypes were assessed in transgenic plants (Figure 6A). *Atfer-2*  
300 homozygotes expressing the MpFER-GFP protein look similar to *Atfer-2* mutants,  
301 indicating that MpFER does not complement these *Atfer-2* loss-of-function phenotypes  
302 (Figure 6A). In a complementary experiment, the coding sequence of AtFER fused to the  
303 Citrine gene under the control of the MpEF1 promoter (*proMpEF1:AtFER-Cit*) was  
304 transformed into amiR-MpFER3-2 plants. Ten independent lines with Citrine expression  
305 at the cell periphery were phenotypically characterized (Figures 6B and 6C). All had  
306 bursting rhizoids and a reduced thallus size, similar to the parental amiR-MpFER3-2 line,  
307 suggesting that AtFER does not rescue the vegetative phenotypes produced by down-  
308 regulation of MpFER.

309 In *A. thaliana*, it was shown that AtFER forms a complex with AtRALF peptides and the  
310 LRE/LLG co-receptors [35]. As no interspecific complementation was observed, the  
311 conservation of binding surfaces between CrRLK1L, RALF, and LRE homologs were  
312 analyzed. The *M. polymorpha* genome encodes three RALF peptides (MpRALF:  
313 Mp1g27120 [Mapoly0002s0166]; MpRALF2: Mp2g21670 [Mapoly0040s0047];  
314 MpRALF3: Mp7g07270 [Mapoly0076s0067]) [44,45]. We performed a phylogenetic  
315 analysis using the amino acid sequences of the predicted mature peptides of *A. thaliana*  
316 and *M. polymorpha* RALFs (Figure S4A). All MpRALF peptides clustered together with  
317 AtRALFs known to interact with CrRLK1L receptors, including AtRALF1 and AtRALF23,  
318 which serve as AtFER ligands [22,33] (Figure S4A). The MpRALFs shared the four  
319 conserved Cys residues as well as the YXXY and YY motifs with the AtRALF1 subgroup  
320 (Figure S4B). However, only MpRALF1 and MpRALF3 had an RRXL motif important for  
321 S1P cleavage (Figures S4B and S4C)[69], consistent with the presence of one S1P  
322 ortholog in basal plants (Mp8g07990 [Mapoly0155s0018], Figure S4D). There are two

323 MpLRE/LLG proteins encoded in the *M. polymorpha*, genome (Figure S5A). Both the  
324 MpLRE1 (Mp5g09600 [Mapoly0048s0110]) and MpLRE2 (Mp4g22100  
325 [Mapoly0090s0020]) proteins showed conservation of the eight Cys and the ND motif  
326 distinctive of the family (Figure S5B); however, MpLRE1 did not contain a GPI anchoring  
327 site (Figure S5B). Structure prediction using AtLLG2 as a template [35] showed a  
328 conserved general structure (Figures S5C and S5D). Some of the MpRALF and MpLRE  
329 family members show a similar expression pattern as MpFER (Figure S5F), suggesting  
330 that the corresponding proteins could form a complex similar to that described in *A.*  
331 *thaliana*.

332 To gain insights into the formation of a putative CrRLK1L signaling complex, the  
333 MpFER/MpRALF/MpLRE complex was modelled. The general structure appeared  
334 conserved (Figure S5E); however, analysis of conserved sites between *M. polymorpha*  
335 and *A. thaliana* showed a low amino acid conservation in the interacting surfaces of the  
336 complex subunits (Figure 6D). This suggests that the lack of interspecific  
337 complementation may be due to differences in amino acids that are important for complex  
338 formation, and that the proteins forming the complex have diverged, following distinct  
339 routes of co-evolution in the two lineages.

340 Because interspecific complementation of the amiR-MpFER phenotypes was  
341 unsuccessful, we asked whether suppression using a downstream component of  
342 CrRLK1L signaling identified in *A. thaliana* was possible. AtMRI, a receptor-like  
343 cytoplasmic kinase, acts downstream of AtFER or AtANX1/2 in the regulation of polar tip  
344 growth [70,71]. The dominant AtMRI<sup>R240C</sup> mutation can suppress pollen tube rupture in  
345 the *Atanx1/Atanx2* double mutant and the root hair defects of *Atfer-4* [70,71]. A mutation  
346 in MpMRI (aka MpPTI) with a similar bursting rhizoid phenotype as observed in *Mpfer-1*,  
347 was identified in the same genetic screen for *M. polymorpha* mutants with defective

348 rhizoids [56]. To test whether MpMRI is a conserved downstream component of the  
349 MpFER signal transduction pathway, a dominant-active form of the protein equivalent to  
350 AtMRI<sup>R240C</sup> was transformed into the amiR-MpFER3-2 line, driven by 2 kb of the  
351 endogenous promoter (*proMpMRI:MpMRI<sup>R240C</sup>*). Several independent lines showed a  
352 partial restoration of rhizoid growth; however, we also observed defects in thallus  
353 development of lines with higher levels of MpMRI expression, mainly abnormalities in the  
354 epidermis (Figures 6E and S6A-S6E). This suggest that MpMRI acts downstream of  
355 MpFER in the signal transduction pathway controlling polarized growth since the origin of  
356 land plants, in agreement with a recent report on the functional characterization of MpMRI  
357 [57].

358

### 359 **Overexpression of MpFER affects morphological integrity**

360 Because overexpressing AtFER in *M. polymorpha* did neither lead to any obvious  
361 phenotypes nor complementation of amiR-MpFER lines (Figures 6B and 6C), we also  
362 overexpressed AtFER and MpFER in the wild type. As in the amiR-MpFER background,  
363 overexpression of AtFER (*proMpEF1:AtFER-Cit*) in a wild-type background had no effect,  
364 consistent with the idea that AtFER is unable to form a complex with the corresponding  
365 *M. polymorpha* proteins. However, when expressing an MpFER-Citrine fusion protein  
366 (*proMpEF1:MpFER-Cit*) in wild-type plants, thallus development was strongly affected  
367 (Figure 7A). As expected, MpFER-Cit localized to the membrane (Figure 7B), and higher  
368 protein levels correlated with more severe phenotype (Figures 7A and 7C). Scanning  
369 electron microscopy of epidermis of plant expressing high levels of MpFER showed  
370 defects in the formation of air chambers and air pores (Figure 7D), similar to what we  
371 observed when expressing the dominant-active MpMRI<sup>R240C</sup> (Figure S6A-S6C).  
372 Moreover, overexpression of MpFER affects the number of lobes in the antheridial



373 receptacle, producing only 4 instead of 8 (Figure S6F), supporting the importance of  
374 MpFER during sexual development. Considering the importance of MpFER for normal  
375 rhizoid formation, we also analyzed rhizoids in the *proMpEF1:MpFER-Cit* lines: while  
376 rhizoid morphology looked normal, a decrease in rhizoid number was observed (Figures  
377 7E and 7F).

378 Taken together, the results obtained by overexpressing MpFER support the role of  
379 MpFER in cell expansion and maintaining tissue integrity during plant morphogenesis.

380

## 381 **Discussion**

382 During land plant evolution, many developmental aspects have changed in order to adapt  
383 to new environments, producing the enormous diversity observed in the plant kingdom.  
384 However, the control and maintenance of CWI remained a key aspect for the biology of  
385 a plant cell. CWI sensing is not only important for vegetative growth by cell expansion,  
386 but it is also essential for sexual reproduction and defense responses.

387 The *CrRLK1L* family was first characterized for its importance during angiosperm  
388 fertilization, a process comprising aspects of polar cell elongation, CWI control, and cell-  
389 cell communication [6,30,31]. Lately, different members of this family were found to carry  
390 out diametrically opposite roles in diverse aspects of plant development, which has made  
391 it difficult to define the core or ancestral function of this gene family comprising 17-  
392 members in *A. thaliana* [6–12,14–20,32].

393 Here, we report the characterization of the single *CrRLK1L* gene encoded in the genome  
394 of *M. polymorpha*. Structurally, the MpFER ECD and kinase domain share similarities  
395 with previous characterized *CrRLK1L* members, including the malectin-like domain and  
396 conserved phosphorylation sites. Conservation of RALF and LRE members in *M.*  
397 *polymorpha* suggests that MpFER also forms a complex at the plasma membrane [35].



398 While modeling predicted that the general structure of the complex was conserved, the  
399 interaction surfaces seem to have diverged and co-evolved independently in the  
400 respective lineages.

401 We observed a broad involvement of Mp*FER* at both vegetative and reproductive stages  
402 of development: During vegetative growth of the gametophyte, Mp*FER* is required for  
403 rhizoid formation and cell expansion but it also plays a role in male gametogenesis and  
404 is expressed in female reproductive organs. These findings suggest that the *CrRLK1Ls*  
405 have, also in ancestral land plants, held roles in various aspects of both vegetative and  
406 reproductive development. Thus, the role of *CrRLK1Ls* in angiosperm reproduction does  
407 not represent a derived feature from a purely vegetative function in cell elongation in  
408 bryophytes, but constitutes a conserved feature of this gene family.

409 Moreover, the almost ubiquitous expression of Mp*FER* in *M. polymorpha* is consistent  
410 with the collective expression of different *CrRLK1L* members in essentially all tissues and  
411 organs of *A. thaliana* [43]. Thus, gene duplication allowed the expansion of the *CrRLK1L*  
412 family in angiosperms, diversifying their expression patterns and functions but also  
413 leading to genetic redundancy [8,17,32,43].

414 *CrRLK1L* members are important sensors of CWI during polarized growth, both in pollen  
415 tubes [8,32] and root hairs [16]. In early divergent land plants, rhizoids are tip-growing cell  
416 with a function analogous to that of root hairs, important for taking up nutrients and water  
417 [56,72]. Based on the conservation of many genes controlling the development and  
418 growth of tip-growing cells forming rooting systems, it was suggested that these pathways  
419 were active in the earliest land plants that existed about 470 million years ago [56]. That  
420 Mp*FER* also controls rhizoid integrity points to the importance of the *CrRLK1L* pathway  
421 for polarized growth since the origin of land plants. Moreover, the fact that amorphic Mp*fer*  
422 mutants contain many dead cells demonstrates the importance of the *CrRLK1L* pathway

423 for cellular integrity during vegetative growth. This aspect has not yet been reported for  
424 *A. thaliana* CrRLK1L mutants, possibly due to genetic redundancy among family  
425 members.

426 The signaling mechanisms downstream of MpFER in *M. polymorpha* development are  
427 still unclear. MpMRI, the *M. polymorpha* ortholog of AtMRI, which acts downstream of  
428 AtFER and AtANX1/2 in *A. thaliana* during polarized growth [70], does have a similar  
429 rhizoid phenotype as MpFER [56,57]. The suppression of the rhizoid phenotype in amiR-  
430 MpFER transformants with the constitutively active form MpMRI<sup>R240C</sup> corroborates a  
431 conserved CrRLK1L signaling cascade during polarized growth in *M. polymorpha* but  
432 whether this pathway also relies on Ca<sup>2+</sup> and reactive oxygen species (ROS) as second  
433 messengers as it does in *A. thaliana* remains to be determined.

434 In *A. thaliana*, loss-of-function mutations in the motor protein AtKINESIN-13a, a  
435 microtubule-based motor, cause cell elongation in petals, leaves, and hypocotyls  
436 concomitant with changes in cell wall composition in leaves [73]. This effect depends on  
437 functional AtTHE1 and does not occur in *Atkinesin-13-a/Atthe1* double mutants.  
438 Interestingly, in this case, AtTHE1 stimulates cell elongation in response to defects in cell  
439 wall deposition [73]. Based on our results, we have no indication that MpFER acts as a  
440 CWI sensor and regulates growth similar to AtTHE1 in response to cell wall disturbances.  
441 We have not observed a context in *M. polymorpha* development in which MpFER inhibits  
442 cell expansion. Therefore, the ability to restrict growth in response to disturbances in CWI  
443 could represent an evolutionary derived feature, as gene duplication allowed for the  
444 diversification and specialization of CrRLK1Ls to regulate cellular growth in a more  
445 complex and context-dependent way. The capacity to flexibly regulate growth appears to  
446 be fundamentally context-dependent, as a similar discrepancy in promoting or inhibiting  
447 growth is also known for some well-studied growth promoting agents, like the

448 phytohormones auxin and brassinosteroid, which can have growth-inhibitory effects  
449 dependent on tissue and concentration. The reverse was noted for the phytohormones  
450 ethylene and abscisic acid, which are usually considered growth inhibitors but can also  
451 promote growth, dependent on the context [74–76].

452 Taken together, our results suggest an ancestral and conserved function of the *CrRLK1Ls*  
453 in polar cell growth and cell expansion, but also during sexual reproduction. In addition,  
454 we probe the relevance of *CrRLK1L* members for cell integrity and morphogenesis. In  
455 angiosperms, *CrRLK1Ls* occupy an important position at the interface of developmental  
456 and environmental inputs, which are integrated by a downstream signaling machinery  
457 that controls cell shape and polar growth to ensure normal development, *e.g.* by  
458 preventing cell rupture upon CWI defects. Whether the same downstream machinery is  
459 utilized in a similar fashion in *M. polymorpha* remains to be shown, even though the  
460 similarity in function points to a related mechanism. Even less is known about upstream  
461 aspects of *CrRLK1L* signaling. Future studies on the transcriptional regulation and the  
462 upstream components, such as the putative RALF ligand(s), in the highly simplified *M.*  
463 *polymorpha* system could provide fundamental insights into the molecular mechanism of  
464 the *CrRLK1L* pathway, which is so central to land plant physiology, growth, and  
465 development.

466

## 467 **Acknowledgments**

468 We thank Liam Dolan for kindly providing the *Mpfer-1/Mpthe* mutant, Valeria Gagliardini  
469 for help with qRT-PCR and ddPCR, Anja Grossniklaus for help in measuring epidermal  
470 cell area, Célia Baroux and Ethel Mendocillo-Sato for instructions on confocal microscopy  
471 and the use of Imaris Software, Isabel Monte and Cyril Zipfel for comments on the

472 manuscript, and Christof Eichenberger, Frédérique Pasquer, Arturo Bolaños, Daniela  
473 Guthörl, Daniel Prata, and Peter Kopf for general lab support.

474

## 475 **Author contributions**

476 MAM: Conceptualization, Formal analysis, Investigation, Methodology, Validation,  
477 Visualization, Writing – original draft, Writing – review & editing

478 MR: Conceptualization, Formal analysis, Investigation, Methodology, Validation,  
479 Visualization, Funding acquisition, Writing – original draft, Writing – review & editing

480 AF-G: Data curation, Formal analysis, Software, Validation, Visualization, Writing –  
481 original draft, Writing – review & editing

482 DM: Formal analysis, Investigation, Validation, Writing – review & editing

483 PG: Formal analysis, Investigation, Validation, Writing – review & editing

484 JLB: Funding acquisition, Resources, Supervision, Validation, Writing – review & editing

485 UG: Conceptualization, Formal analysis, Funding acquisition, Project administration,  
486 Supervision, Validation, Writing – original draft, Writing – review & editing

487

## 488 **Funding disclosure**

489 This work was supported by the University of Zurich, Monash University, and grants from  
490 the Forschungskredit of the University of Zurich

491 (<http://www.research.uzh.ch/en/funding/phd/fkcandoc>; FK-16-090) to MR, the Australian

492 Research Council (<http://www.arc.gov.au>; DP130100177) to JLB, and the Swiss National

493 Science Foundation (<http://www.snf.ch>; 310030B\_160336 and 31003A\_179553) to UG.

494 The funders had no role in study design, data collection and analysis, decision to publish,  
495 or preparation of the manuscript.

496

## 497 **Competing interests**

498 The authors have declared that no competing interests exist.

499

## 500 **Main figure titles and legends**

### 501 **Figure 1. CrRLK1Ls Are Conserved among Land Plants**

502 (A) Representation of AtFER and MpFER proteins. Malectin-like domains are  
503 represented in blue and kinase domains in green. SP, signal peptide; TM, transmembrane  
504 domain (yellow). Amino acids important for regulation and activity are marked in red,  
505 violet, and light blue as described in Figure 1E.

506 (B) A rooted neighbor-joining tree of the amino acid sequence of the predicted malectin-  
507 like domain. CrRLK1L members from *Marchantia polymorpha* (Mp), *Physcomitrella*  
508 *patens* (Pp), *Selaginella moellendorffii* (Smo), and *Arabidopsis thaliana* (At) were used.  
509 The numbers indicate the bootstrap values (%) from 1000 replications. The given scale  
510 represents a substitution frequency of 0.1 amino acids per site.

511 (C) Cartoon representation of the predicted three-dimensional structure of the MpFER  
512 malectin-like domain, showing predicted alpha-helix and beta-sheet structures.

513 (D) Structural superposition of the malectin-like domains of AtFER (blue) and MpFER  
514 (green).

515 (E) Alignment of the cytoplasmic domains of MpFER, AtERU, AtFER, and CrRLK. Kinase  
516 domains are in green, putative phosphorylation sites in light blue (Ser) and violet (Thr),  
517 and the conserved catalytic Lys in red.

518 See also Figure S1

519

520 **Figure 2. MpFER Is Broadly Expressed in most Tissues throughout the *M.***  
521 ***polymorpha* Life Cycle**

522 Expression of *proMpFER:trpVNS* in different organs of male and female *M. polymorpha*  
523 plants. Fluorescence is visualized as either green (epifluorescence microscope) or yellow  
524 (confocal microscope) color, depending on the panel.

525 (A to D) Bright field (left) and epifluorescence (right) images of a thallus, (A) rhizoid (C),  
526 gemmae cups (C), and an archegoniophore (D). Red arrows indicate meristematic zones,  
527 the yellow arrow gemmae. Scale bars, 0.5 mm.

528 (E and F) Confocal images of archegonia before (E) and 2 days after fertilization (F).  
529 Scale bar, 50  $\mu$ m.

530 (G) Bright field (left) and epifluorescence (right) images of an antheridiophore. Scale bar,  
531 1 mm.

532 (H) Confocal image of antheridia. Scale bar, 100  $\mu$ m.

533 (I) Confocal image of sporophyte and spores. Scale bar, 25 $\mu$ m.

534

535 **Figure 3. MpFER Controls Cell Size during Gametophyte Development**

536 (A) Representation of the mature MpFER mRNA. Coding sequence are in green,  
537 locations of the amiRNA target sites in blue.

538 (B) Base complementary between mature amiR-MpFER1, amiR-MpFER2, and amiR-  
539 MpFER3 with the MpFER transcript.

540 (C) Relative expression level of MpFER in thallus tissue from wild-type (WT; Tak1) and  
541 two independent insertion lines of amiR-MpFER2 and amiR-MpFER3, as measured by  
542 qRT-PCR. MpEF1 was used as internal control. Shown are means  $\pm$  standard errors of  
543 the means (SEM) of three biological replicates. \*P < 0.01, one-way analysis of variance  
544 (ANOVA).

545 (D) Relative expression level of Mp*FER* in WT and Mp*fer-1* thallus tissue, as measured  
546 by qRT-PCR. Mp*EF1* was used as internal control. Shown are means  $\pm$  SEM of three  
547 biological replicates. \*P < 0.01, one-way ANOVA.

548 (E) Representative pictures of 10-day old gemmalings of WT, Mp*fer-1*, and amiR-  
549 Mp*FER3-2* lines. Scale bar, 1 mm.

550 (F) Thallus area of WT, Mp*fer-1*, and amiR-Mp*FER3-2* lines. n = 30, outliers are indicated  
551 as black dots.

552 (G) Violin plot of cell size in WT, Mp*fer-1*, and amiR-Mp*FER3-2* lines. Significant  
553 differences are indicated according to the non-parametric Kruskal-Wallis test and linear  
554 regression models (\*\*p<0.001).

555 See also Figures S2 and S3

556

557 **Figure 4. The Integrity of Thalli from Mp*fer* Knock-out Lines Is Severely Affected**

558 (A) Representation of the mature Mp*FER* mRNA with the coding sequence in green, and  
559 the location of the gRNA target sites in red.

560 (B) Sequences of gRNA target sites in the confirmed Mp*fer* knock-out mutants. Deletions  
561 and insertions are highlighted in red.

562 (C) Representative pictures of 10-day old gemmalings of WT, Mp*fer-1*, and two  
563 independent Mp*fer* knock-out mutants. Scale bar, 0.5 cm.

564 (D) Thallus area of 10-day old gemmalings of WT, Mp*fer-1*, and two independent Mp*fer*  
565 knock-out mutants. n = 30.

566 (E) Representative pictures of 3-day old gemmalings growing in upside-down plates of  
567 WT, Mp*fer-1*, and two independent Mp*fer* knock-out mutants. Scale bar, 500  $\mu$ m.

568 (F) Rhizoid number in 3-day old gemmalings of WT, Mp*fer-1*, and two independent Mp*fer*  
569 knock-out mutants. n = 30.

570 (G) Trypan blue staining of 7-days old gemmalings of WT, *Mpfer-1*, and two independent  
571 *Mpfer* knock-out mutants. Scale bar, 1 mm.

572

### 573 **Figure 5. Conservation of CrRLK1L Function in Land Plants**

574 (A) Number of antheridiophores produced per plant for wild-type (WT, n=9) and two  
575 independent amiR-MpFER3 lines (amiR-MpFER3-2, n = 9; amiR-MpFER3-3, n = 12).  
576 Shown are means  $\pm$  SEM of two biological replicates. Means with same letter do not differ  
577 significant different with  $P > 0.05$ , one-way ANOVA, Duncan test.

578 (B) Antheridiophore splash platform size distribution of WT (n = 32), amiR-MpFER2-3 (n  
579 = 34), and amiR-MpFER3-3 (n = 11) lines. For all antheridia with a stalk  $>8$  mm, length  
580 and width of the platform were recorded.

581 (C) qRT-PCR of MpFER levels in antheridiophores in a WT and amiR-MpFER3-3 line.  
582 MpEF1 was used as internal control. Shown are means  $\pm$  SEM of three biological  
583 replicates. \* $P < 0.01$ , ANOVA.

584 (D and E) Mature antheridia of a WT (D) and amiR-MpFER3-3 line (E). Bright field images  
585 (left) and in cross-section (right). The spermatogenous areas are indicated in red. Scale  
586 bar,  $100\mu\text{m}$ .

587 (F) Thallus area of 15-day old gemmalings of WT, *Mpfer-1* mutant, and an amiR-  
588 MpFER3-2 line growing on media containing different isoxaben concentrations (nM). n =  
589 30, outliers are indicated as black dots. Shown are means  $\pm$  SEM of two biological  
590 replicates. Means designated by the same letter do not significantly differ at  $P > 0.05$ ,  
591 one-way ANOVA, Duncan test.

592 See also Figure S3

593



594 **Figure 6. Interspecific Complementation of *A. thaliana* and *M. polymorpha* Plants**  
595 **with Reduced Levels of *FER* Activity**

596 (A) Roots of independent *A. thaliana* lines expressing 35S:Mp*FER-GFP* in *Ler* wild-type  
597 (WT) and *Atfer-2* plants. Scale bar, 200  $\mu$ m.

598 (B) 10-day old gemmalings of WT and amiR-Mp*FER3-2* *M. polymorpha* plants with and  
599 without expression of *AtFER-Cit*. Scale bar, 0.5 mm.

600 (C) Citrine expression in 7-day old gemmalings of WT and amiR-Mp*FER3-2* plants with  
601 and without expression of *AtFER-Cit*. Scale bar, 100  $\mu$ m.

602 (D) Cartoon representation of the structural conservation of the *CrRLK1L<sup>ECD</sup>/LRE/RALF*  
603 complex by comparing *AtFER/MpFER* and *AtLLG2/MpLRE1*. Blue and green represent  
604 spatially highly conserved regions of *CrRLK1L* and *LRE* homologs, respectively. Red  
605 indicates structural regions with low spatial conservation, lilac the C-terminal part of  
606 *AtRALF23*, and black arrows the interaction regions of the three proteins.

607 (E) Complementation of amiR-Mp*FER* lines with a dominant-active version of *MpMRI*  
608 under its own promoter (*proMpMRI:MRI<sup>R240C</sup>*). Scale bar, 1 mm.

609 See also Figures S4-S7

610

611 **Figure 7: Overexpression of *MpFER* Affects Morphological Integrity**

612 (A) Representative pictures of 10-day old gemmalings of wild-type (WT, Tak1) and  
613 different lines overexpressing *MpFER* (*proMpEF1:MpFER-Cit*). Scale bar, 1 mm.

614 (B) Citrine expression at the plasma membrane in WT and *proMpEF1:MpFER-Cit* lines #5  
615 and #9 as observed under confocal microscopy. Scale bar, 20  $\mu$ m.

616 (C) Western blot analysis of *proMpEF1:MpFER-Cit* lines using an anti-GFP antibody.  
617 *proMpEF1:Cit* and WT lines were used as positive and negative controls, respectively. The

618 Ponceau membrane staining of the most intense band at 55 kDa (presumably Rubisco)  
619 was used as a loading control.

620 (D) Scanning electron microscopical images of thalli from 20-day old plants of WT and  
621 *proMpEF1:MpFER-Cit* lines #5 and #9. Scale bar, 500  $\mu$ m.

622 (E) Representative pictures of 3-day old gemmalings growing in upside-down plates of  
623 WT and *proMpEF1:MpFER-Cit* lines #5 and #9. Scale bar, 1 mm.

624 (F) Number of rhizoids in 3-day old gemmalings of WT and *proMpEF1:MpFER-Cit* lines #5  
625 and #9. n = 30.

626 See also Figure S6

627

## 628 **Supplemental figure titles and legends**

629

630 **Figure S1. The CrRLK1L Family Appeared together with Land Plants. Related to**  
631 **Figure 1.**

632 (A) Percentage of identity of the malectin-like domain, the complete ECD, and the full  
633 protein of MpFER with AtFER, AtANX1, AtANX2, and AtTHE1.

634 (B) Percentage of identity of the ECD and full protein of CpRLK1 with MpFER, AtFER,  
635 and Mapoly001s0111.

636 (C) A rooted neighbor-joining tree of the amino acid sequence of the predicted malectin-  
637 like domain was generated using ClustalW. CrRLK1L members from *Marchantia*  
638 *polymorpha* (Mp), *Physcomitrella patens* (Pp), *Selaginella moellendorffii* (Smoe), and  
639 *Arabidopsis thaliana* (At) were used. Algal CpRLK1 and Mapoly001s0111 were also  
640 included. The numbers indicate the bootstrap values (%) from 1000 replications. The  
641 given scale represents a substitution frequency of 0.1 amino acids per site.

642 (D) Qmean value for prediction of MpFER or CpRLK1 3D structures of the ECD based  
643 on the AtFER ECD. Green numbers indicate a good modelling fit, red numbers indicates  
644 a bad modelling fit.

645 (E) Structural superposition of the ECD of AtFER (blue) and CpRLK1 (purple).

646

647 **Figure S2. Design of amiR-MpFER Precursors. Related to Figure 3.**

648 (A) *MpmiR160* (Mapoly0002s0211, Mp1g26670) and amiR-MpFER1, amiR-MpFER2,  
649 and amiR-MpFER sequences. miRNA sequences are in red and miRNA\* in blue. Cloning  
650 sequences from amiR-MpFER constructs are in bold.

651 (B) Drawing of the minimum free energy structure of *MpmiR160* and amiR-MpFER3  
652 constructs predicted by the RNAfold web server ([http://rna.tbi.univie.ac.at/cgi-](http://rna.tbi.univie.ac.at/cgi-bin/RNAWebSuite/RNAfold.cgi)  
653 [bin/RNAWebSuite/RNAfold.cgi](http://rna.tbi.univie.ac.at/cgi-bin/RNAWebSuite/RNAfold.cgi)). Red arrows indicate location and orientation of the  
654 mature miRNA in the precursor. The structures are colored by base-pairing probabilities;  
655 for unpaired regions the color denotes the probability of being unpaired.

656

657 **Figure S3. Reduction in Thallus and Cell Area in Plants with Reduced MpFER**  
658 **Levels. Related to Figures 3 and 5.**

659 (A) Thallus area of wild-type (WT), *Mpfer-1*, and amiR-MpFER3-2 plants at different days  
660 after putting gemmae on plates. n = 30, outliers are indicated as black dots. Areas were  
661 estimated using ImageJ software.

662 (B) Representative images from cell surface areas measured in WT, amiR-MpFER2-1,  
663 and amiR-MpFER3-2 plants. Scale bar, 50  $\mu$ m.

664 (C) Difference in cell size between WT, amiR-MpFER2-1, and amiR-MpFER3-2 plants is  
665 significant ( $p < 0.001$ ) based on the nonparametric Kruskal-Wallis test and a linear  
666 regression model with a highly significant interaction ( $p < 0.001$ ).

667 (D) Induction of antheridiophores in WT and two independent amiR-Mp*FER3* lines. Three  
668 plants were grown in each sterile plastic box under far-red light induction.

669

670 **Figure S4. MpRALF Peptides Belong to the AtRALF1-clade of the RALF Family.**  
671 **Related to Figure 6.**

672 (A) A rooted neighbor-joining tree of the amino acid sequence of the predicted mature  
673 RALF peptides was generated using ClustalW. RALF members from *M. polymorpha* and  
674 *A. thaliana* were used. Red arrows indicate RALFs that are known ligands of CrRLK1Ls.  
675 The numbers indicate the bootstrap values (%) from 1000 replications. The given scale  
676 represents a substitution frequency of 0.1 amino acids per site.

677 (B) Amino acid sequence comparison of AtRALF1 and MpRALF1-3. Predicted signal  
678 peptides are in black, predicted mature peptides in light blue, conserved Cys in red, and  
679 predicted S1P recognition sites in violet.

680 (C) Processing pathway AtRALF1 by the S1P protease.

681 (D) A rooted neighbor-joining tree of the amino acid sequence of the S1P orthologs was  
682 generated using ClustalW. S1P members from *M. polymorpha*, *P. patens*, and *A. thaliana*  
683 were used. The numbers indicate the bootstrap values (%) from 1000 replications. The  
684 given scale represents a substitution frequency of 0.1 amino acids per site.

685

686 **Figure S5. Two LORELEI-like Proteins Are Encoded in the *M. polymorpha* Genome.**  
687 **Related to Figure 6.**

688 (A) A rooted neighbor-joining tree of the amino acid sequence of LRE orthologs was  
689 generated using ClustalW. LRE members from *M. polymorpha*, *P. patens*, and *A. thaliana*  
690 were used. The numbers indicate the bootstrap values (%) from 1000 replications. The  
691 given scale represents a substitution frequency of 0.1 amino acids per site.

692 (B) Amino acid sequence of AtLRE, MpLRE1, and MpLRE2. Conserved Cys are in light  
693 blue, the ND motif in red, and the GPI-anchoring site in green.

694 (C) Cartoon representation of the predicted 3-dimensional structure of MpLRE1, showing  
695 predicted alpha-helices.

696 (D) Structural superposition of AtLGG2 (blue) and MpLRE1 (green).

697 (E) Cartoon representation of the predicted 3-dimensional structure of the  
698 MpFER/MpLRE1/MpRALF1 complex, showing predicted alpha-helices and beta-sheets.

699 (F) Heatmap depicting relative gene expression based on RNAseq data (row-Z-score of  
700 vs normalized counts) of MpFER and the *M. polymorpha* orthologs of AtMRI, AtRALF1,  
701 and AtLRE across different tissues. Vegetative and reproductive tissues are grouped by  
702 green and orange, respectively. Averaged expression values are represented with colors  
703 of increasing red and blue intensity indicating upregulation and downregulation of gene  
704 expression, respectively.

705

706 **Figure S6. Expression of MpMRI<sup>R240C</sup> Suppresses the Bursted Rhizoid Phenotype**  
707 **of amiR-MpFER3 Lines but Leads to Aberrant Epidermis Development. Related to**  
708 **Figures 6 and 7.**

709 (A to C) Epidemical pictures of thalli from the wild-type (WT, Tak-1) (A), and amiR-  
710 MpFER3 + <sub>pro</sub>MpMRI:MpMRI<sup>R240C</sup> lines #6 (B) and #8 (C), which both partially suppressed  
711 the bursting rhizoid phenotype (Fig. 6).

712 (D and E) Relative expression of MpFER (D) and MpMRI (E) against the geometric mean  
713 of the reference genes MpACT1, MpACT7, and MpAPT3 in WT, amiR-MpFER3-2, and 5  
714 lines (#5 to #9) co-transformed with the amiR-MpFER3-2 and <sub>pro</sub>MpMRI:MpMRI<sup>R240C</sup>  
715 constructs. Expression levels of three biological replicates were assessed by droplet  
716 digital PCR (ddPCR). The y-axis corresponds to the log<sub>2</sub>-ratio between the test and the

717 geometric mean of the reference genes. Shown are means  $\pm$  SEMs of three biological  
718 replicates. \*P < 0.01, one-way ANOVA.

719 (F) Representative images of the antheridial receptacle of WT and *pro*MpEF1:MpFER-Cit  
720 plants. Scale bar, 2 mm.

721

722 **Figure S7. Structure Assessment and Quality Estimations of the MpFER and**  
723 **MpLRE 3-dimensional Models. Related to Figure 6.**

724 QMEAN score barplot indicating quality estimates of the predicted models, across their  
725 aminoacidic sequence. Below the barplots, the corresponding secondary structures are  
726 displayed for both target and template sequences, with alpha-helices represented by light  
727 purple boxes and beta-sheets by green arrows. All plots were adapted from the model  
728 report produced by the SWISS-MODEL workspace.

729 (A) MpFER<sup>ECD</sup>, for which AtFER was used as a template (PDB 6a5b.1A).

730 (B) MpLRE1, for which AtLLG2 was used as a template (PDB 6a5d.1A).

731

## 732 **RESOURCE AVAILABILITY**

733

### 734 **Lead Contact**

735 Further information and requests for resources and reagents should be directed to and  
736 will be fulfilled by the Lead Contact, Ueli Grossniklaus ([grossnik@botinst.uzh.ch](mailto:grossnik@botinst.uzh.ch)).

737

### 738 **Materials Availability,**

739 Requests for other strains and plasmids should be directed to the Lead Contact.

740

## 741 **Data and Code Availability.**

742 This study did not generate datasets or code.

743

## 744 **EXPERIMENTAL MODEL AND SUBJECT DETAILS**

745 *M. polymorpha* subsp. *ruderalis* plants were grown on sterile culture on half-strength  
746 Gamborg's B5 basal medium (PhytoTechnology Laboratories), supplemented with 1%  
747 phytoagar in Petri dishes sealed with air-permeable tape. The plants were kept under  
748 fluorescent light and long-day conditions (16 h light at 22°C, 8 h dark at 20 °C) in Percival  
749 growth cabinets (models AR-41L3 and AR-41/L2). Alternatively, to induce sexual  
750 reproduction, plants were cultivated in jiffy pots filled with a 1:1 mixture of soil  
751 ("Einheitserde D73 + Bims", Universallerde) and sand or in culture boxes in sterile culture  
752 on half-strength Gamborg's B5 basal medium (Duchefa Eco2 Box, #E1654), under  
753 fluorescent light supplemented with far-red light (GreenPower LED module HF far-red,  
754 #929000464503 and #929000632103 Philips).

755 Wild-type (WT) plants in all experiments were *Arabidopsis thaliana* L. (Heyn) accession  
756 Ler-0. The *Atfer-2* mutant was obtained from the Signal Collection at the Salk Institute.  
757 Plants were grown in soil (ED73; Universallerde), covered with a thin quartz sand layer,  
758 under long photoperiods (16 hs light/8 hs dark) at 23°C and 60% relative humidity.

759

## 760 **METHOD DETAILS**

### 761 **Phylogenetic analysis**

762 Protein sequences were identified in plant genomes via BLASTp searches in  
763 <https://phytozome.jgi.doe.gov/pz/portal.html>. To elucidate the evolutionary relationship  
764 across land plant evolutionary history, we focused on *A. thaliana*, *Selaginella*

765 *moellendorffii*, *Physcomitrella patens* and *M. polymorpha*, as representative species for  
766 angiosperms, lycophytes, mosses and liverworts, respectively. Complete or partial coding  
767 protein sequences were aligned using the ClustalW parameters and were conducted in  
768 MEGA7. Phylogenetic trees were constructed with Neighbor-joining method, with a  
769 bootstrap test of 1000 replicates. The evolutionary distances were computed using the  
770 Poisson correction method.

771

## 772 **Vector construction**

773 Expression constructs: a BJ36 plasmid [77] containing a tripleVENUS-NLS (trpVNS)  
774 fragment was modified by adding a ligation-independent cloning (LiC) adapter site [78].  
775 A promoter fragment of Mp*FER* of 3.2 kb was amplified using primers specified below  
776 and cloned into the BJ36 vector via LiC cloning. *pro*Mp*FER* promoter fragment fused to  
777 trpVNS was then shuttled via *NotI* restriction sites into the HART01 [77] expression  
778 vector. The expression vector was also directly modified to contain the LiC sites, so  
779 promoter fragments can now be directly cloned in front of the trpVNS in the HART01  
780 vector via LiC-cloning. This vector was called VHL (trpVNS-containing HART01 vector  
781 with LiC sites).

782 amiRNA constructs: For functional analyses three independent artificial microRNA  
783 (amiRNA) constructs were made (Figure S2). The endogenous microRNA precursor  
784 Mp*miR160* was used as both backbone and template to design the constructs which  
785 generate single species small RNA molecules of 21 nt length, complementary to the  
786 target gene transcript [63,79]. Three miR160 backbones containing independent amiR-  
787 Mp*FER*/amiR-Mp*FER*\* duplexes were synthesized by GenScript and fused to the  
788 *pro*Mp*EF1* promoter in the BJ36 shuttle vector and shuttled to the HART01 expression  
789 vector as described previously [79]. The folding structure and design procedures were



790 explained in detail in [63,79]. The sequences for the amiRNAs were designed to retain  
791 the exact physical properties of the endogenous *MpmiR160* template. The folding  
792 patterns were analyzed in the Mfold software [80] and the sequences synthesized (Figure  
793 S2).

794 CRISPR/Cas gRNA: Selection of target sites was done using CasFinder [81].  
795 Complementary oligos were designed and annealed for ligation into gRNA, in the  
796 pMpGE\_En03 vector, previously digested with Bsal restriction enzyme. Resulting gRNAs  
797 were incorporated into binary vector pMpGE011 through gateway recombination.

798 Over-expression of *MpFER* and *AtFER*: The full-length *MpFER* sequence was amplified  
799 from genomic *M. polymorpha* DNA with attB sites and Gateway-cloned via pDONR207.  
800 For *A. thaliana* expression, *MpFER* was introduced into the expression vectors  
801 pMDC201, which contains a *2X35S* promoter fragment and an in-frame C-terminal  
802 mGFP6 [82]. For *M. polymorpha* expression, *MpFER* was introduced into the binary  
803 vector pMpGWB308, which contains a *MpEF1* promoter and an in-frame C-terminal  
804 citrine [83]. Similarly, for expression of *AtFER* in *M. polymorpha*, coding sequence of  
805 *AtFER* was introduced into pMpGWB308 binary vector, for the generation of  
806 *proMpEF1:AtFER-Cit* construct.

807

### 808 **Quantitative real-time PCR (qRT-PCR) and droplet digital PCR (ddPCR)**

809 RNA extraction from *M. polymorpha*: RNA extraction from thallus tissue (ca. 100mg  
810 including apical notch) was done using the Rneasy plant mini kit (#74904, Qiagen). To  
811 remove contaminating DNA, the TURBO DNasefree™ Kit (AM1907 Ambion) was used  
812 according to manufacturer's recommendations. To extract RNA from the gametophores  
813 (2 antheridiophores > 5mm diameter were pooled, respectively, for each replicate), the  
814 Direct(-zol) RNA MiniPrep (#R2050, ZymoResearch) was used with TRIzol Reagent

815 (#15596026, Ambion) according to the manufacturer's protocol, including on-column  
816 DNase digestion and subsequent TURBO DNA-free™ Kit (AM1907 Ambion) treatment.  
817 RNA samples were quantified using the Qubit® RNA HS Assay Kit (#Q32852, Life  
818 Technologies), a Nanodrop ND-1000 Spectrometer or an Agilent 2100 BioAnalyzer.  
819 cDNA synthesis: cDNA was synthesized from 0.5 µg or 1.0 µg of total RNA. Reverse  
820 transcription was performed in 25 µl with 20 µg/ml Oligo(dT) 12-18 primers and 200 units  
821 of SuperScript® II Reverse Transcriptase (#18064-014, Invitrogen) according to the  
822 manufacturer's protocol. The resulting cDNA was diluted 1:9 by adding nuclease-free  
823 water. To control for genomic DNA contamination, control replicates of all samples were  
824 incubated without SuperScript® II reverse transcriptase.  
825 Primer tests and quantitative RT-PCR: Primer efficiency and concentration tests were  
826 carried out for *MpFER* and suitable reference genes as described previously (Rövekamp  
827 et al., 2016, Althoff et al., 2014). Amplification experiments were carried out using a 7500  
828 Applied Biosystem Fast Real-Time PCR System. Reactions were performed in 20 µl  
829 volumes containing 10 µl 2X SYBR-green mastermix (SsoAdvanced™ Universal  
830 SYBRGreen Supermix), 200 nM (*MpEF1* and *MpFER*) or 250 nM (*MpACTIN*) forward and  
831 reverse primers, and 1 µl diluted cDNA. Where possible, three technical and biological  
832 replicates were performed for each reaction. The primers used for the qRT-PCR are  
833 summarized in Table S1.  
834 For ddPCR analysis, individual PCR reactions were performed in a total volume of 25 µl,  
835 using 1X ddPCR EvaGreen Supermix, with droplets generated according to  
836 manufacturer's recommendations. Reading of the PCR-amplified droplets was carried out  
837 by the QX200 Droplet Reader (Bio-Rad) and analysed by the QuantaSoft™ Software  
838 (v1.4, Bio-Rad). The counts from ddPCR were normalised through a log<sub>2</sub> transformation.  
839 Afterwards, relative expression was calculated against the geometric mean of the counts

840 for all three reference genes (*MpACT1*, *MpACT7*, and *MpAPT3*) [84]: ( $\log_2(\text{gene tested}$   
841  $+ 1) - \log_2(\text{geom. mean of all references} + 1)$ ). The primers used for the ddPCR are  
842 summarized in Table S1.

843

#### 844 **Transformation into *M. polymorpha* and *A. thaliana***

845 *Agrobacterium*-mediated transformation using regenerating thalli of *M. polymorpha* was  
846 done by co-cultivation 15-days old Marchantia fragments with transformed *Agrobacterium*  
847 *tumefaciens* (GV3101) cells [85,86]. After three days of incubation, positive transformants  
848 were selected on Gamborg's B5 plates supplemented with 10  $\mu\text{g/ml}$  Hygromycin B  
849 (Invitrogen), 0.5  $\mu\text{M}$  Chlorosulfuron or Kanamycin, and 100  $\mu\text{g/ml}$  of Cefotaxime sodium.  
850 Isogenic lines were obtained by using plants derived from gemmae of the T1 generation  
851 (G1 generation). G1 or subsequent gemmae generations were used for all experiments,  
852 as they are derived from single cells [87,88]. Transformation of *A. thaliana* via *A.*  
853 *tumefaciens* (GV3101) was performed by floral dipping according to [89]. Primers used  
854 for amplification of promoter fragments of *MpFER* are listed in Table S2.

855

#### 856 **Microscopy**

857 Plants were observed in a Lumar.V12 (Zeiss) or a Leica MZFLIII dissection microscope  
858 and photographed with an AxioCam HRc (Zeiss) or Leica DFC 420C camera. Clearings  
859 were observed using a Leica DMR microscope and photographed with an AxioCam 105  
860 color camera. Fluorescence reporter expression were analyzed using a Leica SP5  
861 confocal microscope. Fiji [90] and GIMP (version 2.8.10) software were used for  
862 adjustments of brightness, contrast, channel selection, and image size.

863 Tissue clearing for bright field microscopy: *M. polymorpha* tissues were fixed in Carnoy's  
864 solution and incubated at 4°C overnight, followed by rehydration in an ethanol series of

865 85%, 70%, 50%, and 30%. Samples were incubated for 1 hour at 4°C for each step and  
866 then incubated in chloral hydrate solution at 4°C overnight. Samples were mounted in  
867 chloral hydrate.

868 Calcofluor-white staining for cell size measurements: Pieces of fresh thallus tissue  
869 located in fully differentiated zones [91] of plants grown on plates were dissected out and  
870 put into water. The pieces were transferred to PBS pH 6.1 containing 100 µg/ml  
871 Calcofluor-white and vacuum-infiltrated for 1 hour before being mounted on slides. The  
872 area of the epidermal cells was measured using Imaris 8.3.1. software. Cells of air pores  
873 and the two adjacent cell layers were excluded from the analysis, as well as the spiralling  
874 cells surrounding newly developing air pores.

875 For cell-death staining, seven-days old gemmalings were stained with lactophenol-  
876 trypanblue (10 mL of lactic acid, 10 mL of glycerol, 10 g of phenol, 10 mg of trypan blue,  
877 dissolved in 10 mL of distilled water) and boiled for approximately 1 min in the stain  
878 solution and then decolorized in chloral hydrate (2.5 g of chloral hydrate dissolved in 1  
879 mL of distilled water) for at least 30 min. They were mounted in chloral hydrate and  
880 imaged in dissecting microscope.

881

## 882 **Western blot analysis**

883 *M. polymorpha* explants were ground in liquid nitrogen and resuspended in 300 µL of  
884 Laemmli buffer [92]. After centrifugation at 6,000 rpm for 5 min at 4°C, the supernatant  
885 was recovered. Protein accumulation was confirmed by Western blotting, using the anti-  
886 GFP antibody (1:3000, Torrey Pines Biolabs). As secondary antibodies, the Agrisera  
887 S09602 goat anti-rabbit antibody was used with the ECL-chemistry of FUSION FX -  
888 Western Blot & Chemi Imaging (Vilber Lourmat).

889

## 890 **Growth rate experiments**

891 Gemmae of wild-type, *Mpfer-1*, and independent transformation lines of amiR-*MpFER*  
892 lines were grown on plates and the thallus area was measured over time. 10 or 30  
893 gemmae of four independent transformation lines were grown on half-strength Gamborg's  
894 B5 and scanned on an Epson 2450 Photo scanner at 600dpi. Plant area was measured  
895 using color threshold settings and particle analysis in the Fiji software [90].

896

## 897 **Expression map**

898 Gene expression of *CrRLK1L* signaling pathway components was calculated from  
899 publicly available RNA-seq data of 39 samples of *M. polymorpha* Tak-1 and Tak.2.  
900 Samples were grouped by tissue and analyzed under the same pipeline: Nextera paired-  
901 end adapters were trimmed from sequencing reads using the bbdduk tool embedded in  
902 the BBMap software package [93]. Read ends with quality below 20 were also trimmed  
903 and the minimum read length was set to 25. The rest of parameters of bbdduk were set as  
904 default. Reads were mapped to *M. polymorpha* reference genome (v3.1) [45] using the  
905 Tophat software (v2.1.1) [94], designed for RNA-sequencing read mapping. Tophat  
906 contains Bowtie (v2.3.2.0) [95] as the aligner software. All parameters were set to default  
907 values except for the RAM memory and number of used Cores. Mapped reads were  
908 sorted using samtools (v1.3.1) [96] and counted with the software HTSeq-count" (v.0.9.1)  
909 [97]. Gene expression values were calculated using the package DESeq2 (Release 3.6)  
910 [98] for R software (v3.4.4) [99]. Another R package, ggplot2 (release 2.2.1) [100] was  
911 used for producing the figures. A summary of the samples that were used in this study is  
912 provided in Table S3.

913

914

## 915 **Three-dimensional (3D) protein structure modeling**

916 Comparative modeling of protein 3D structures was performed using the SWISS-MODEL  
917 online-tool [60]. The software was fed with the three protein sequences of MpFER,  
918 MpRALF1, and MpLRE1 as input to model, and one PDB file as a 3D template, which  
919 contains the published crystal structure of the protein complex formed by AtFER,  
920 AtRALF23, and AtLLG2 [35]. Quality control of the model was assessed using the same  
921 tool and the results are summarized in Figure S5E. Spatial comparisons of the *M.*  
922 *polymorpha* predicted structures with the crystal structures of *A. thaliana* were performed  
923 in PyMol [101].

924

## 925 **QUANTIFICATION AND STATISTICAL ANALYSIS**

926 Analyses were performed in InfoStat (<http://www.infostat.com.ar>). Tests are indicated in  
927 the corresponding figure legend.

928

## 929 **References**

- 930 1. Showalter AM. (1993). Structure and function of plant cell wall proteins. *Plant Cell* 5, 9–23.
- 931 2. Franck CM, Westermann J, Boisson-Dernier A. (2018). Plant malectin-like receptor kinases: from cell  
932 wall integrity to immunity and beyond. *Annu Rev Plant Biol* 69, 301–328.
- 933 3. Shiu SH, Bleecker AB. (2001). Plant receptor-like kinase gene family: diversity, function, and  
934 signaling. *Sci STKE* 2001, re22.
- 935 4. Steinwand BJ, Kieber JJ. (2010). The role of receptor-like kinases in regulating cell wall function.  
936 *Plant Physiol.* 153, 479–84.
- 937 5. Wolf S, Hématy K, Hofte H. (2012). Growth control and cell wall signaling in plants. *Annu Rev Plant*  
938 *Biol* 63, 381–407.
- 939 6. Escobar-Restrepo J-M, Huck N, Kessler S, Gagliardini V, Gheyselinck J, et al. (2007). The FERONIA  
940 receptor-like kinase mediates male-female interactions during pollen tube reception. *Science* 317,  
941 656–660.

- 942 7. Hématy K, Sado PE, Van Tuinen A, Rochange S, Desnos T, et al. (2007). A receptor-like kinase  
943 mediates the response of *Arabidopsis* cells to the inhibition of cellulose synthesis. *Curr Biol.* *17*,  
944 922–931.
- 945 8. Boisson-Dernier A, Roy S, Kritsas K, Grobei MA, Jaciubek M, Schroeder, J.I., Grossniklaus, U. (2009).  
946 Disruption of the pollen-expressed *FERONIA* homologs *ANXUR1* and *ANXUR2* triggers pollen tube  
947 discharge. *Development* *136*, 3279–3288.
- 948 9. Guo H, Li L, Ye H, Yu X, Algreen A, Yin Y. (2009). Three related receptor-like kinases are required for  
949 optimal cell elongation in *Arabidopsis thaliana*. *Proc Natl Acad Sci USA* *106*, 7648–7653.
- 950 10. Guo H, Ye H, Li L, Yin Y. (2009). A family of receptor-like kinases are regulated by *BES1* and involved  
951 in plant growth in *Arabidopsis thaliana*. *Plant Signal Behav* *4*, 784–786.
- 952 11. Kessler SA, Shimosato-Asano H, Keinath NF, Wuest SE, Ingram G, et al. (2010). Conserved molecular  
953 components for pollen tube reception and fungal invasion. *Science* *330*, 968–971.
- 954 12. Bai L, Ma X, Zhang G, Song S, Zhou Y, et al. (2014). A receptor-like kinase mediates ammonium  
955 homeostasis and is important for the polar growth of root hairs in *Arabidopsis*. *Plant Cell* *26*, 1497–  
956 511.
- 957 13. Schoenaers S, Balcerowicz D, Breen G, Hill K, Zdanio M, Mouille G, Holman TJ, Oh J, Wilson MH, et  
958 al., (2018). The auxin-regulated CrRLK1L kinase ERULUS controls cell wall composition during root  
959 hair tip growth. *Curr. Biol.* *28*, 722–732.
- 960 14. Miyazaki S, Murata T, Sakurai-Ozato N, Kubo M, Demura T, et al. (2009). *ANXUR1* and 2, sister  
961 genes to *FERONIA/SIRENE*, are male factors for coordinated fertilization. *Curr Biol.* *19*, 1327–1331.
- 962 15. Keinath NF, Kierszniowska S, Lorek J, Bourdais G, Kessler SA, Shimosato-Asano H, Grossniklaus U,  
963 Schulze WX, Robatzek S, Panstruga RJ (2010). PAMP (pathogen-associated molecular pattern)-  
964 induced changes in plasma membrane compartmentalization reveal novel components of plant  
965 immunity. *J Biol Chem* *285*, 39140–39149.
- 966 16. Duan Q, Kita D, Li C, Cheung AY, Wu HM. (2010). *FERONIA* receptor-like kinase regulates RHO  
967 GTPase signaling of root hair development. *Proc Natl Acad Sci USA* *107*, 17821–17826.
- 968 17. Galindo-Trigo S, Blanco-Touriñán N, DeFalco TA, Wells ES, Gray JE, Zipfel C, Smith LM. (2020).  
969 CrRLK1L receptor-like kinases HERK1 and ANJEA are female determinants of pollen tube reception.  
970 *EMBO Rep* *21*, e48466.
- 971 18. Zhu L, Chu LC, Liang Y, Zhang XQ, Chen LQ, Ye D. (2018). The *Arabidopsis* CrRLK1L protein kinases  
972 BUPS1 and BUPS2 are required for normal growth of pollen tubes in the pistil. *Plant J* *95*, 474–486.
- 973 19. Li C, Yeh F-L, Cheung AY, Duan Q, Kita D, et al. (2015). Glycosylphosphatidylinositol-anchored  
974 proteins as chaperones and co-receptors for *FERONIA* receptor kinase signaling in *Arabidopsis*. *eLife*  
975 *4*, e06587.
- 976 20. Richter J, Ploderer M, Mongelard G, Gutierrez L, Hauser MT. (2017). Role of CrRLK1L cell wall  
977 sensors HERCULES1 and 2, THESEUS1, and *FERONIA* in growth adaptation triggered by heavy metals  
978 and trace elements. *Front Plant Sci* *8*, 1554.



- 979 21. Richter J, Watson JM, Stasnik P, Borowska M, Neuhold J, Berger M, Stolt-Bergner P, Schoft V,  
980 Hauser MT. (2018). Multiplex mutagenesis of four clustered *CrRLK1L* with CRISPR/Cas9 exposes  
981 their growth regulatory roles in response to metal ions. *Sci Rep* 8, 12182.
- 982 22. Stegmann M, Monaghan J, Smakowska-Luzan E, Rovenich H, Lehner A, et al. (2017). The receptor  
983 kinase FER is a RALF-regulated scaffold controlling plant immune signaling. *Science* 355, 287–289.
- 984 23. Ngo QA, Vogler H, Lituiev DS, Nestorova A, Grossniklaus U. (2014). A calcium dialog mediated by  
985 the *FERONIA* signal transduction pathway controls plant sperm delivery. *Dev Cell* 29, 491–500.
- 986 24. Yu F, Qian L, Nibau C, Duan Q, Kita D, et al. (2012). *FERONIA* receptor kinase pathway suppresses  
987 abscisic acid signaling in *Arabidopsis* by activating ABI2 phosphatase. *Proc Natl Acad Sci USA* 109,  
988 14693–14698.
- 989 25. Mao D, Yu F, Li J, Van de Poel B, Tan D, et al. (2015). *FERONIA* receptor kinase interacts with S-  
990 adenosylmethionine synthetase and suppresses S-adenosylmethionine production and ethylene  
991 biosynthesis in *Arabidopsis*. *Plant Cell Env.* 38, 2566–2574.
- 992 26. Deslauriers SD, Larsen PB. (2010). *FERONIA* is a key modulator of brassinosteroid and ethylene  
993 responsiveness in *Arabidopsis* hypocotyls. *Mol Plant* 3, 626–640.
- 994 27. Shih H-W, Miller ND, Dai C, Spalding EP, Monshausen GB. (2014). The receptor-like kinase *FERONIA*  
995 is required for mechanical signal transduction in *Arabidopsis* seedlings. *Curr Biol.* 24, 1887–1892.
- 996 28. Denness L, McKenna JF, Segonzac C, Wormit A, Madhou P, et al. (2011). Cell wall damage-induced  
997 lignin biosynthesis is regulated by a reactive oxygen species- and jasmonic acid-dependent process  
998 in *Arabidopsis*. *Plant Physiol* 156, 1367–1374.
- 999 29. Okuda S, Tsutsui H, Shiina K, Sprunck S, Takeuchi H, Yui R, Kasahara RD, Hamamura Y, Mizukami A,  
1000 Susaki D, Kawano N, Sakakibara T, Namiki S, Itoh K, Otsuka K, Matsuzaki M, Nozaki H, Kuroiwa T,  
1001 Nakano A, Kanaoka MM, Dresselhaus T, Sasaki N, Higashiyama T. (2009). Defensin-like polypeptide  
1002 LUREs are pollen tube attractants secreted from synergid cells. *Nature* 458, 357–361.
- 1003 30. Huck N, Moore JM, Federer M, Grossniklaus U. (2003). The *Arabidopsis* mutant *feronia* disrupts the  
1004 female gametophytic control of pollen tube reception. *Development* 130, 2149–2159.
- 1005 31. Rotman N, Rozier F, Boavida L, Dumas C, Berger F, Faure J-E. (2003). Female control of male gamete  
1006 delivery during fertilization in *Arabidopsis thaliana*. *Curr Biol.* 13, 432–436.
- 1007 32. Ge Z, Bergonci T, Zhao Y, Zou Y, Du S, et al. (2017). *Arabidopsis* pollen tube integrity and sperm  
1008 release are regulated by RALF-mediated signaling. *Science* 358, 1596–1600.
- 1009 33. Haruta M, Sabat G, Stecker K, Minkoff BB, Sussman MR. (2014). A peptide hormone and its receptor  
1010 protein kinase regulate plant cell expansion. *Science* 343, 408–411.
- 1011 34. Dünser K, Gupta S, Herger A, Feraru MI, Ringli C, Kleine-Vehn J. (2019). Extracellular matrix sensing  
1012 by *FERONIA* and Leucine-Rich Repeat Extensins controls vacuolar expansion during cellular  
1013 elongation in *Arabidopsis thaliana*. *EMBO J* 38, pii: e100353.
- 1014 35. Xiao Y, Stegmann M, Han Z, DeFalco TA, Parys K, Xu L, Belkhadir Y, Zipfel C, Chai J. (2019).  
1015 Mechanisms of RALF peptide perception by a heterotypic receptor complex. *Nature* 572, 270–274.



- 1016 36. Mecchia MA, Santos-Fernandez G, Duss NN, Somoza SC, Boisson-Dernier A, et al. (2017). RALF4/19  
1017 peptides interact with LRX proteins to control pollen tube growth in *Arabidopsis*. *Science* 358,  
1018 1600–1603.
- 1019 37. Capron A, Gourgues M, Neiva LS, Faure J-E, Berger F, Pagnussat G, Krishnan A, Alvarez-Mejia C,  
1020 Vielle-Calzada JP, Lee YR, Liu B, Sundaresan V. (2008). Maternal control of male-gamete delivery in  
1021 *Arabidopsis* involves a putative GPI-anchored protein encoded by the *LORELEI* gene. *Plant Cell* 20,  
1022 3038–3049.
- 1023 38. Boisson-Dernier A, Kessler SA, Grossniklaus U. (2011). The walls have ears: the role of plant  
1024 *CrRLK1*Ls in sensing and transducing extracellular signals. *J Exp Bot* 62.
- 1025 39. Hématy K, Höfte H. (2008). Novel receptor kinases involved in growth regulation. *Curr Opin Plant*  
1026 *Biol.* 11, 321–328.
- 1027 40. Cheung AY, Wu HM. (2011). THESEUS 1, FERONIA and relatives: a family of cell wall-sensing  
1028 receptor kinases? *Curr Opin Plant Biol* 14, 632–641.
- 1029 41. Nissen KS, Willats WGT, Malinovsky FG. (2016). Understanding *CrRLK1*L function: cell walls and  
1030 growth control. *Trends Plant Sci* 21, 516–527.
- 1031 42. Feng W, Kita D, Peaucelle A, Cartwright HN, Doan V, Duan Q, Liu MC, Maman J, Steinhorst L,  
1032 Schmitz-Thom I, Yvon R, Kudla J, Wu HM, Cheung AY, Dinneny JR. (2018). The FERONIA receptor  
1033 kinase maintains cell-wall integrity during salt stress through Ca<sup>2+</sup> signaling. *Curr Biol.* 28, 666–675.
- 1034 43. Lindner H, Müller LM, Boisson-Dernier A, Grossniklaus U. (2012). *CrRLK1*L receptor-like kinases: not  
1035 just another brick in the wall. *Curr Opin Plant Biol* 15, 656–669.
- 1036 44. Galindo-Trigo S, Gray JE, Smith LM. (2016). Conserved roles of *CrRLK1*L receptor-like kinases in cell  
1037 expansion and reproduction from algae to angiosperms. *Front Plant Sci* 7, 1269.
- 1038 45. Bowman JL, Kohchi T, Yamato KT, Jenkins J, Shu S, Ishizaki K, et al. (2017). Insights into land plant  
1039 evolution garnered from the *Marchantia polymorpha* genome. *Cell* 171, 287-304.e15.
- 1040 46. Rövekamp M, Bowman JL, Grossniklaus U. (2014). Back to the rhizoids of plant sexual development.  
1041 Abstr. 23rd Intl. Congr. Sex. Plant Reprod. Porto Port.,  
1042 <https://www.fc.up.pt/sprporto2014/doc/23rd%20International%20congress%20on%20sexual%20p>  
1043 [lant%20reproduction%20ABSBook.pdf](https://www.fc.up.pt/sprporto2014/doc/23rd%20International%20congress%20on%20sexual%20p).
- 1044 47. Bowman JL, Floyd SK, Sakakibara K (2007). Green genes-comparative genomics of the green branch  
1045 of life. *Cell* 129, 229–234.
- 1046 48. Nishiyama T, Fujita T, Shin-I T, Seki M, Nishide H, Uchiyama I, Kamiya A, Carninci P, Hayashizaki Y,  
1047 Shinozaki K, et al. (2003). Comparative genomics of *Physcomitrella patens* gametophytic  
1048 transcriptome and *Arabidopsis thaliana*: implication for land plant evolution. *Proc Natl Acad Sci USA*  
1049 100, 8007–8012.
- 1050 49. Qiu YL, Li L, Wang B, Chen Z, Knoop V, Groth-Malonek M, Dombrovskaya O, Lee J, Kent L, Rest J, et al.  
1051 (2006). The deepest divergences in land plants inferred from phylogenomic evidence. *Proc Natl*  
1052 *Acad Sci USA* 103, 15511–15516.

- 1053 50. Wickett NJ, Mirarab S, Nguyen N, Warnow T, Carpenter E, Matasci N, Ayyampalayam S, Barker MS,  
1054 Burleigh JG, Gitzendanner MA, et al. (2014). Phylotranscriptomic analysis of the origin and early  
1055 diversification of land plants. *Proc Natl Acad Sci USA* *1111*, E4859–E4868.
- 1056 51. Mishler BD, Churchill SP (1984). A cladistic approach to the phylogeny of the “bryophytes.”  
1057 *Brittonia* *36*, 406–424.
- 1058 52. Kenrick P, Crane PR (1997). The origin and early evolution of plants on land. *Nature* *389*, 33–39.
- 1059 53. Floyd SK, Bowman JL. (2007). The ancestral developmental tool kit of land plants. *Int J Plant Sci* *168*,  
1060 1–35.
- 1061 54. Bowman JL, Araki T, Arteaga-Vazquez MA, Berger F, Dolan L, Haseloff J, Ishizaki K, Kyojuka J, Lin SS,  
1062 Nagasaki H, Nakagami H, Nakajima K, Nakamura Y, Ohashi-Ito K, Sawa S, Shimamura M, Solano R,  
1063 Tsukaya H, Ueda T, Watanabe Y, Yamato KT, Zachgo S, Kohchi T (2016). The naming of names:  
1064 guidelines for gene nomenclature in *Marchantia*. *Plant Cell Physiol* *57*, 257–261.
- 1065 55. Ishizaki K (2017). Evolution of land plants: insights from molecular studies on basal lineages. *Biosci*  
1066 *Biotechnol Biochem* *81*, 73–80.
- 1067 56. Honkanen S, Jones VAS, Morieri G, Champion C, Hetherington AJ, Kelly S, Proust H, Saint-Marcoux  
1068 D, Prescott H, Dolan L. (2016). The mechanism forming the cell surface of tip-growing rooting cells  
1069 is conserved among land plants. *Curr Biol.* *26*, 3238–3244.
- 1070 57. Westermann J, Streubel S, Franck CM, Lentz R, Dolan L, Boisson-Dernier A. (2019). An evolutionarily  
1071 conserved receptor-like kinases signaling module controls cell wall integrity during tip growth. *Curr*  
1072 *Biol.* *29*, 4153.
- 1073 58. Kessler SA, Lindner H, Jones DS, Grossniklaus U. (2014). Functional analysis of related *CrRLK1L*  
1074 receptor-like kinases in pollen tube reception. *EMBO Rep* *16*, 107–115.
- 1075 59. Hirano N, Marukawa Y, Abe J, Hashiba S, Ichikawa M, Tanabe Y, (2015). A receptor-like kinase,  
1076 related to cell wall sensor of higher plants, is required for sexual reproduction in the unicellular  
1077 Charophycean alga, *Closterium peracerosum–strigosum– littorale* Complex. *Plant Cell Physiol* *56*,  
1078 1456–1462.
- 1079 60. Schwede T, Kopp J, Guex N, Peitsch MC (2003). SWISS-MODEL: an automated protein homology-  
1080 modeling server. *Nucleic Acids Res.* *31*, 3381–3385.
- 1081 61. Liu L, Zheng C, Kuang B, Wei L, Yan L, Wang T (2016). Receptor-like kinase RUPO interacts with  
1082 potassium transporters to regulate pollen tube growth and integrity in rice. *PLoS Genet* *12*,  
1083 e1006085.
- 1084 62. Schulze-Muth P, Irmeler S, Schröder G, Schröder J (1996). Novel type of receptor-like protein kinase  
1085 from a higher plant (*Catharanthus roseus*): cDNA, gene, intramolecular autophosphorylation, and  
1086 identification of a threonine important for auto- and substrate phosphorylation. *J Biol Chem* *271*,  
1087 26684–26689.
- 1088 63. Flores-Sandoval E, Dierschke T, Fisher TJ, Bowman JL (2016). Efficient and inducible use of artificial  
1089 microRNAs in *Marchantia polymorpha*. *Plant Cell Physiol* *57*, 281–290.

- 1090 64. Althoff F, Kopischke S, Zobell O, Ide K, Ishizaki K, Kohchi T, Zachgo S. (2014). Comparison of the  
1091 MpEF1 $\alpha$  and CaMV35 promoters for application in *Marchantia polymorpha* overexpression studies.  
1092 Transgenic Res. 23, 235–244.
- 1093 65. Gonneau M, Desprez T, Martin M, Doblas VG, Bacete L, Miart F, Sormani R, Hématy K, Renou J,  
1094 Landrein B et al. (2018). Receptor kinase THESEUS1 is a RAPID ALKALINIZATION FACTOR34 receptor  
1095 in *Arabidopsis*. Curr Biol. 28, 2452–2458.
- 1096 66. Gachomo EW, Jno Baptiste L, Kefela T, Saidel WM, Kotchoni SO (2014). The *Arabidopsis* CURVY1  
1097 (CVY1) gene encoding a novel receptor-like protein kinase regulates cell morphogenesis, flowering  
1098 time and seed production. BMC Plant Biol 14, 221.
- 1099 67. Merz D, Richter J, Gonneau M, Sanchez-Rodriguez C, Eder T, Sormani R, Martin M, Hématy K, Höfte  
1100 H, Hauser MT (2017). T-DNA alleles of the receptor kinase THESEUS1 with opposing effects on cell  
1101 wall integrity signaling. J Exp Bot 68, 4583–4593.
- 1102 68. Chiyoda S, Ishizaki K, Kataoka H, Yamato KT, Kohchi T (2008). Direct transformation of the liverwort  
1103 *Marchantia polymorpha* L. by particle bombardment using immature thalli developing from spores.  
1104 Plant Cell Rep 27, 1467–1473.
- 1105 69. Srivastava R, Liu JX, Guo H, Yin Y, Howell SH (2009). Regulation and processing of a plant peptide  
1106 hormone, AtRALF23, in *Arabidopsis*. Plant J 59, 930–939.
- 1107 70. Boisson-Dernier A, Franck CM, Lituiev DS, Grossniklaus U. (2015). Receptor-like cytoplasmic kinase  
1108 MARIS functions downstream of CrRLK1L-dependent signaling during tip growth. Proc Natl Acad Sci  
1109 USA 112, 12211–12216.
- 1110 71. Liao H-Z, Zhu M-M, Cui H-H, Du X-Y, Tang Y, et al. (2016). MARIS plays important roles in  
1111 *Arabidopsis* pollen tube and root hair growth. J Integr Plant Biol 58, 927–940.
- 1112 72. Bowen EJ (1935). A note on the conduction of water in *Fimbriaria bleumeana*. Ann. Bot. 49, 844–  
1113 848.
- 1114 73. Fujikura U, Elsaesser L, Breuninger H, Sánchez-Rodríguez C, Ivakov A, Laux T, Findlay K, Persson S,  
1115 Lenhard M. (2014). Atkinesin-13A modulates cell-wall synthesis and cell expansion in *Arabidopsis*  
1116 *thaliana* via the THESEUS1 pathway. PLoS Genet 10, e1004627.
- 1117 74. Pierik R, Tholen D, Poorter H, Visser EJ, Voesenek LA (2006). The Janus face of ethylene: growth  
1118 inhibition and stimulation. Trends Plant Sci 11, 176–183.
- 1119 75. Wolf S, Höfte H. (2014). Growth control: a saga of cell walls, ROS, and peptide receptors. Plant Cell  
1120 26, 1848–1856.
- 1121 76. Humplík JF, Bergougnoux V, Van Volkenburgh E (2017). To stimulate or inhibit? That Is the question  
1122 for the function of abscisic acid. Trends Plant Sci 22, 830–841.
- 1123 77. Flores-Sandoval E, Eklund DM, Bowman, JL (2015). A simple auxin transcriptional response system  
1124 regulates multiple morphogenetic processes in the liverwort *Marchantia polymorpha*. PLoS Genet  
1125 11, e1005207.

- 1126 78. De Rybel B, van den Berg W, Lokerse AS., Liao C-Y, van Mourik H, Moller B, Llavata-Peris CI, Weijers  
1127 D (2011). A versatile set of ligation-independent cloning vectors for functional studies in plants.  
1128 *Plant Physiol.* 156, 1292–1299.
- 1129 79. Rövekamp M, Bowman JL, Grossniklaus U (2016). *Marchantia* MpR<sub>1</sub>CD regulates the gametophyte-  
1130 sporophyte transition by keeping egg cells quiescent in the absence of fertilization. *Curr. Biol.* 26,  
1131 1782–1789.
- 1132 80. Zuker M. (2003). Mfold web server for nucleic acid folding and hybridization prediction. *Nucleic  
1133 Acids Res* 31, 3406–3415.
- 1134 81. Aach J, Mali P, Church GM (2014). CasFinder: flexible algorithm for identifying specific Cas9 targets  
1135 in genomes. *BioRxiv* Doi 101101005074.
- 1136 82. Curtis MD, Grossniklaus U (2003). A Gateway cloning vector set for high-throughput functional  
1137 analysis of genes *in planta*. *Plant Physiol.* 133, 462–469.
- 1138 83. Ishizaki K, Nishihama R, Ueda M, Inoue K, Ishida S, Nishimura Y, Shikanai T, Kohchi T (2015).  
1139 Development of Gateway binary vector series with four different selection markers for the  
1140 liverwort *Marchantia polymorpha*. *PLoS ONE* 10, e0138876.
- 1141 84. Vandesompele J, De Preter K, Pattyn F, Poppe B, Van Roy N, De Paepe A, Speleman F. (2002).  
1142 Accurate normalization of real-time quantitative RT-PCR data by geometric averaging of multiple  
1143 internal control genes. *Genome Biol* 3, RESEARCH0034.
- 1144 85. Kubota A, Ishizaki K, Hosaka M, Kohchi T (2013). Efficient *Agrobacterium*-mediated transformation  
1145 of the liverwort *Marchantia polymorpha* using regenerating thalli. *Biosci Biotechnol Biochem* 77,  
1146 167–172.
- 1147 86. Ishizaki K, Chiyoda S, Yamato KT, Kohchi, T (2008). *Agrobacterium*-mediated transformation of the  
1148 haploid liverwort *Marchantia polymorpha* L., an emerging model for plant biology. *Plant Cell  
1149 Physiol.* 49, 1084–1091.
- 1150 87. Barnes CR, Land WJG. (1907). Bryological papers. I. The origin of air chambers. *Bot Gaz* 44, 197–213.
- 1151 88. Hughes SJ (1971). On conidia of fungi, and gemmae of algae, bryophytes, and pteridophytes. *Can J  
1152 Bot* 49, 1319–1339.
- 1153 89. Bent A. (2006). *Agrobacterium* protocols. Totowa NJ Humana Press *Volume 1*.
- 1154 90. Schindelin J, Arganda-Carreras I, Frise E, Kaynig V, Longair M, Pietzsch T, Preibisch S, et al. (2012).  
1155 Fiji: An open-source platform for biological-image analysis. *Nat. Methods* 9, 676–682.
- 1156 91. Solly JE, Cunniffe NJ Harrison CJ (2017). Regional growth rate differences specified by apical notch  
1157 activities regulate liverwort thallus shape. *Curr. Biol.* 27, 16–26.
- 1158 92. Laemmli UK (1970). Cleavage of structural proteins during the assembly of the head of  
1159 bacteriophage T4. *Nature* 227, 680–685.
- 1160 93. Bushnell B (2014). BBMap: a fast, accurate, splice-aware aligner (No. LBNL-7065E). Lawrence  
1161 Berkeley Natl. LabLBNL Berkeley, CA, USA.

- 1162 94. Trapnell C, Pachter L, Salzberg SL (2009). TopHat: discovering splice junctions with RNA-Seq.  
1163 Bioinformatics 25, 1105–1111.
- 1164 95. Langdon WB (2015). Performance of genetic programming optimised Bowtie2 on genome  
1165 comparison and analytic testing (GCAT) benchmarks. BioData Min. 8, 1.
- 1166 96. Li H, Handsaker B, Wysoker A, Fennell T, Ruan J, Homer N, et al (2009). The sequence  
1167 alignment/map format and SAMtools. Bioinformatics 25, 2078–2079.
- 1168 97. Anders S, Pyl PT, Huber W. (2015). HTSeq—a Python framework to work with high-throughput  
1169 sequencing data. Bioinformatics 31, 166–169.
- 1170 98. Love MI, Huber W, Anders S (2014). Moderated estimation of fold change and dispersion for RNA-  
1171 seq data with DESeq2. Genome Biol. 15, 550.
- 1172 99. Team RC (2013). R: A language and environment for statistical computing.
- 1173 100. Wickham H (2016). ggplot2: elegant graphics for data analysis. *Springer*.
- 1174 101. DeLano WL (2002). Pymol: An open-source molecular graphics tool. CCP4 Newsl. Protein  
1175 Crystallogr. 40, 82–92.
- 1176





1190 (C) Cartoon representation of the predicted three-dimensional structure of the MpFER  
1191 malectin-like domain, showing predicted alpha-helix and beta-sheet structures.

1192 (D) Structural superposition of the malectin-like domains of AtFER (blue) and MpFER  
1193 (green).

1194 (E) Alignment of the cytoplasmic domains of MpFER, AtERU, AtFER, and CrRLK. Kinase  
1195 domains are in green, putative phosphorylation sites in light blue (Ser) and violet (Thr),  
1196 and the conserved catalytic Lys in red.

1197 See also Figure S1

1198

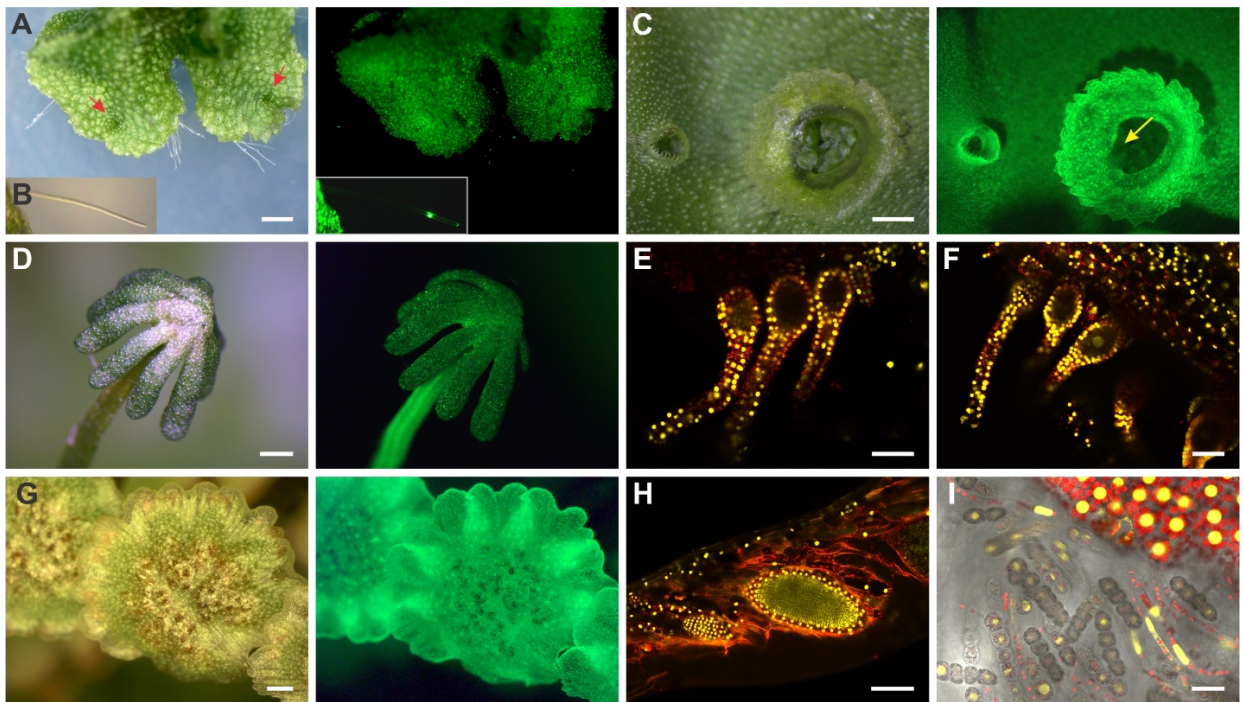

1199

1200

1201 **Figure 2. MpFER Is Broadly Expressed in most Tissues throughout the *M.***  
1202 ***polymorpha* Life Cycle**

1203 Expression of *proMpFER:trpVNS* in different organs of male and female *M. polymorpha*  
1204 plants. Fluorescence is visualized as either green (epifluorescence microscope) or yellow  
1205 (confocal microscope) color, depending on the panel.

1206 (A to D) Bright field (left) and epifluorescence (right) images of a thallus, (A) rhizoid (C),  
1207 gemmae cups (C), and an archegoniophore (D). Red arrows indicate meristematic zones,  
1208 the yellow arrow gemmae. Scale bars, 0.5 mm.

1209 (E and F) Confocal images of archegonia before (E) and 2 days after fertilization (F).  
1210 Scale bar, 50  $\mu$ m.

1211 (G) Bright field (left) and epifluorescence (right) images of an antheridiophore. Scale bar,  
1212 1 mm.

1213 (H) Confocal image of antheridia. Scale bar, 100  $\mu$ m.

1214 (I) Confocal image of sporophyte and spores. Scale bar, 25 $\mu$ m.



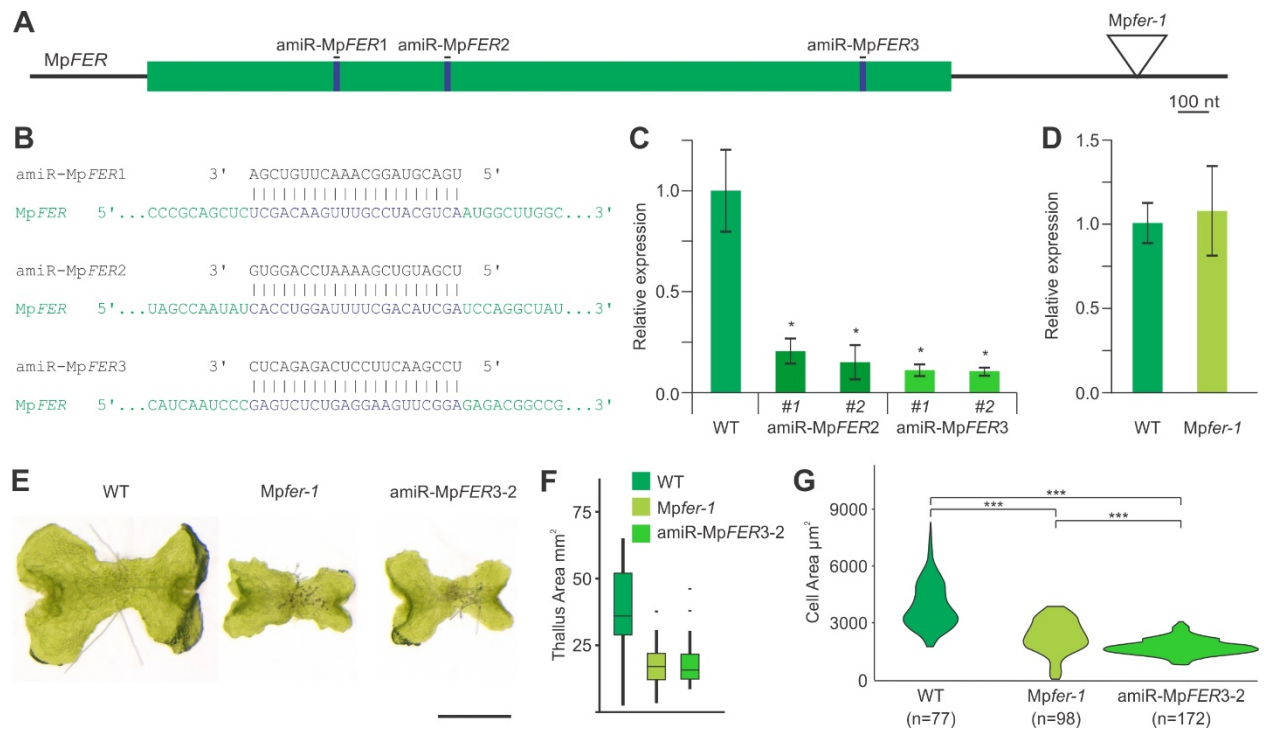

1215

1216

### 1217 **Figure 3. MpFER Controls Cell Size during Gametophyte Development**

1218 (A) Representation of the mature *MpFER* mRNA. Coding sequence are in green,  
 1219 locations of the amiRNA target sites in blue.

1220 (B) Base complementarity between mature amiR-*MpFER1*, amiR-*MpFER2*, and amiR-  
 1221 *MpFER3* with the *MpFER* transcript.

1222 (C) Relative expression level of *MpFER* in thallus tissue from wild-type (WT; Tak1) and  
 1223 two independent insertion lines of amiR-*MpFER2* and amiR-*MpFER3*, as measured by  
 1224 qRT-PCR. *MpEF1* was used as internal control. Shown are means  $\pm$  standard errors of  
 1225 the means (SEM) of three biological replicates. \* $P < 0.01$ , one-way analysis of variance  
 1226 (ANOVA).

1227 (D) Relative expression level of *MpFER* in WT and *Mpfer-1* thallus tissue, as measured  
 1228 by qRT-PCR. *MpEF1* was used as internal control. Shown are means  $\pm$  SEM of three  
 1229 biological replicates. \* $P < 0.01$ , one-way ANOVA.

1230 (E) Representative pictures of 10-day old gemmalings of WT, *Mpfer-1*, and amiR-  
1231 *MpFER3-2* lines. Scale bar, 1 mm.

1232 (F) Thallus area of WT, *Mpfer-1*, and amiR-*MpFER3-2* lines. n = 30, outliers are indicated  
1233 as black dots.

1234 (G) Violin plot of cell size in WT, *Mpfer-1*, and amiR-*MpFER3-2* lines. Significant  
1235 differences are indicated according to the non-parametric Kruskal-Wallis test and linear  
1236 regression models (\*\*p<0.001).

1237 See also Figures S2 and S3

1238

1239

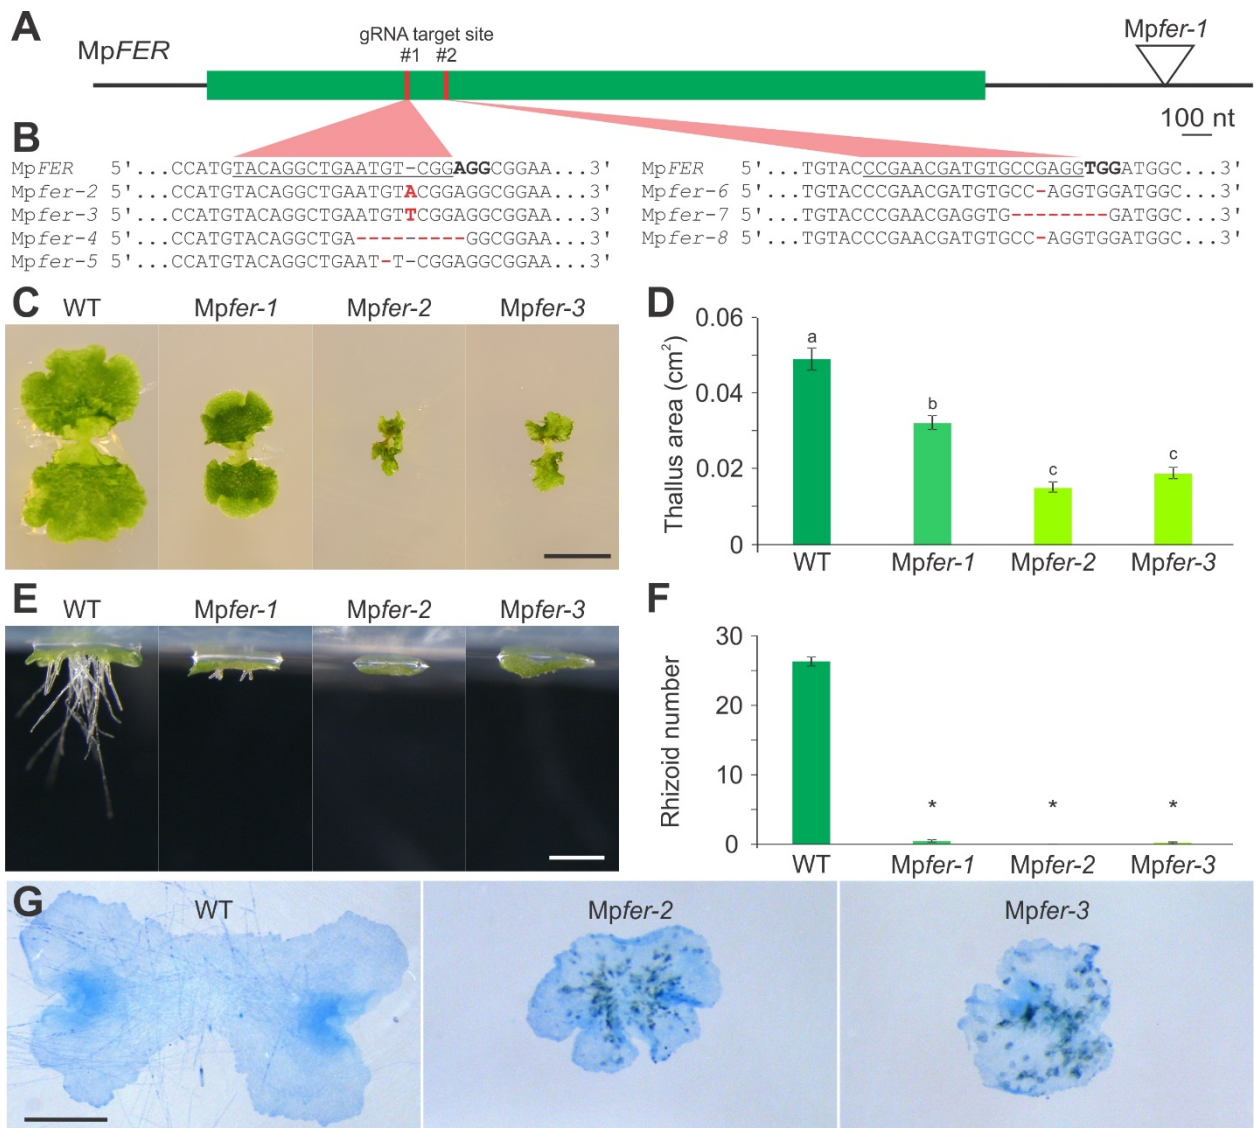

1240

1241

1242 **Figure 4. The Integrity of Thalli from *Mpfer* Knock-out Lines Is Severely Affected**

1243 (A) Representation of the mature *MpFER* mRNA with the coding sequence in green, and  
 1244 the location of the gRNA target sites in red.

1245 (B) Sequences of gRNA target sites in the confirmed *Mpfer* knock-out mutants. Deletions  
 1246 and insertions are highlighted in red.

1247 (C) Representative pictures of 10-day old gemmalings of WT, *Mpfer-1*, and two  
 1248 independent *Mpfer* knock-out mutants. Scale bar, 0.5 cm.

1249 (D) Thallus area of 10-day old gemmalings of WT, *Mpfer-1*, and two independent *Mpfer*  
1250 knock-out mutants. n = 30.

1251 (E) Representative pictures of 3-day old gemmalings growing in upside-down plates of  
1252 WT, *Mpfer-1*, and two independent *Mpfer* knock-out mutants. Scale bar, 500  $\mu$ m.

1253 (F) Rhizoid number in 3-day old gemmalings of WT, *Mpfer-1*, and two independent *Mpfer*  
1254 knock-out mutants. n = 30.

1255 (G) Trypan blue staining of 7-days old gemmalings of WT, *Mpfer-1*, and two independent  
1256 *Mpfer* knock-out mutants. Scale bar, 1 mm.

1257

1258

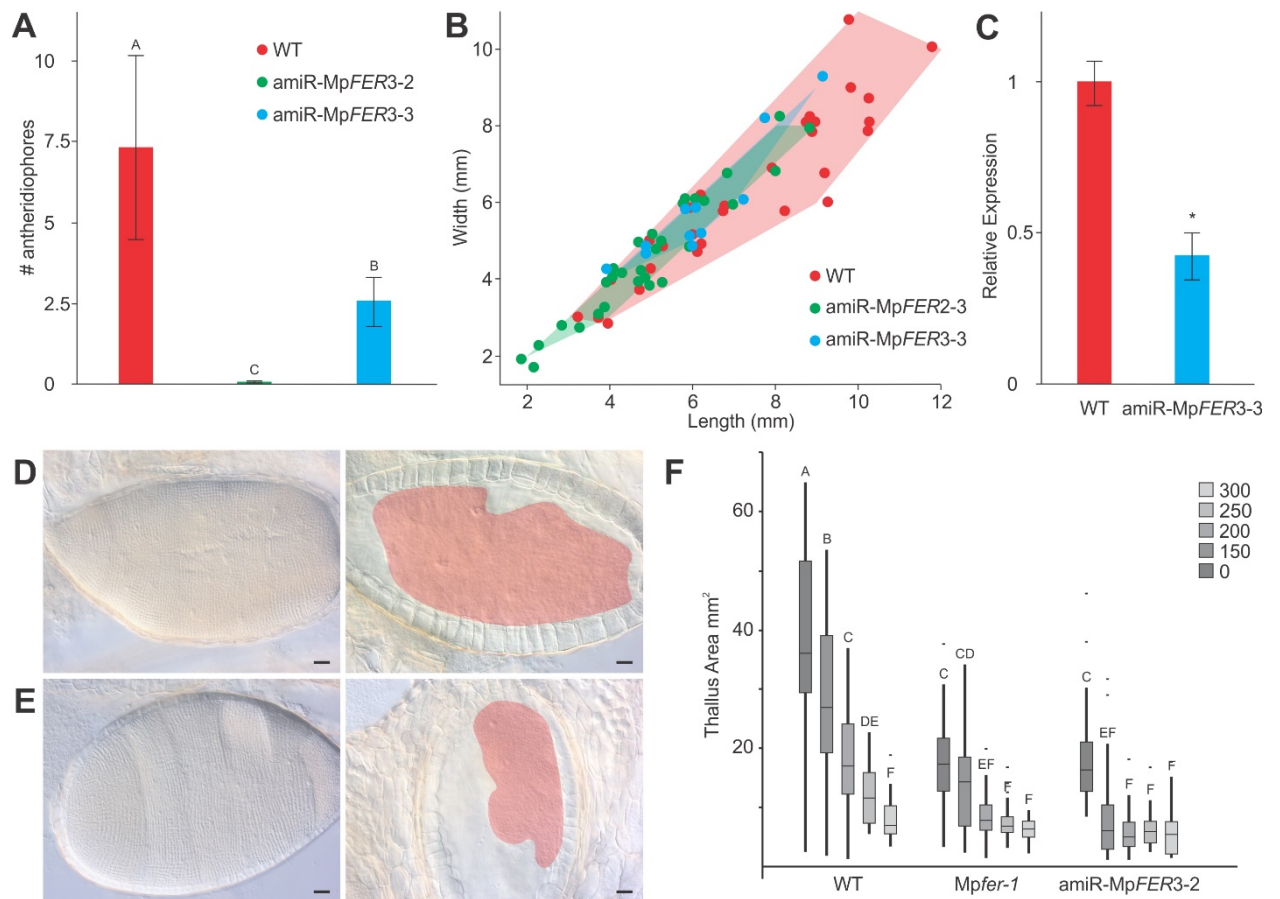

1259

1260

## 1261 **Figure 5. Conservation of CrRLK1L Function in Land Plants**

1262 (A) Number of antheridiophores produced per plant for wild-type (WT, n=9) and two  
 1263 independent amiR-MpFER3 lines (amiR-MpFER3-2, n = 9; amiR-MpFER3-3, n = 12).  
 1264 Shown are means  $\pm$  SEM of two biological replicates. Means with same letter do not differ  
 1265 significant different with  $P > 0.05$ , one-way ANOVA, Duncan test.

1266 (B) Antheridiophore splash platform size distribution of WT (n = 32), amiR-MpFER2-3 (n  
 1267 = 34), and amiR-MpFER3-3 (n = 11) lines. For all antheridia with a stalk  $>8$  mm, length  
 1268 and width of the platform were recorded.

1269 (C) qRT-PCR of MpFER levels in antheridiophores in a WT and amiR-MpFER3-3 line.  
 1270 MpEF1 was used as internal control. Shown are means  $\pm$  SEM of three biological  
 1271 replicates. \* $P < 0.01$ , ANOVA.

1272 (D and E) Mature antheridia of a WT (D) and amiR-Mp*FER3-3* line (E). Bright field images  
1273 (left) and in cross-section (right). The spermatogenous areas are indicated in red. Scale  
1274 bar, 100 $\mu$ m.

1275 (F) Thallus area of 15-day old gemmalings of WT, *Mpfer-1* mutant, and an amiR-  
1276 Mp*FER3-2* line growing on media containing different isoxaben concentrations (nM). n =  
1277 30, outliers are indicated as black dots. Shown are means  $\pm$  SEM of two biological  
1278 replicates. Means designated by the same letter do not significantly differ at  $P > 0.05$ ,  
1279 one-way ANOVA, Duncan test.

1280 See also Figure S3

1281



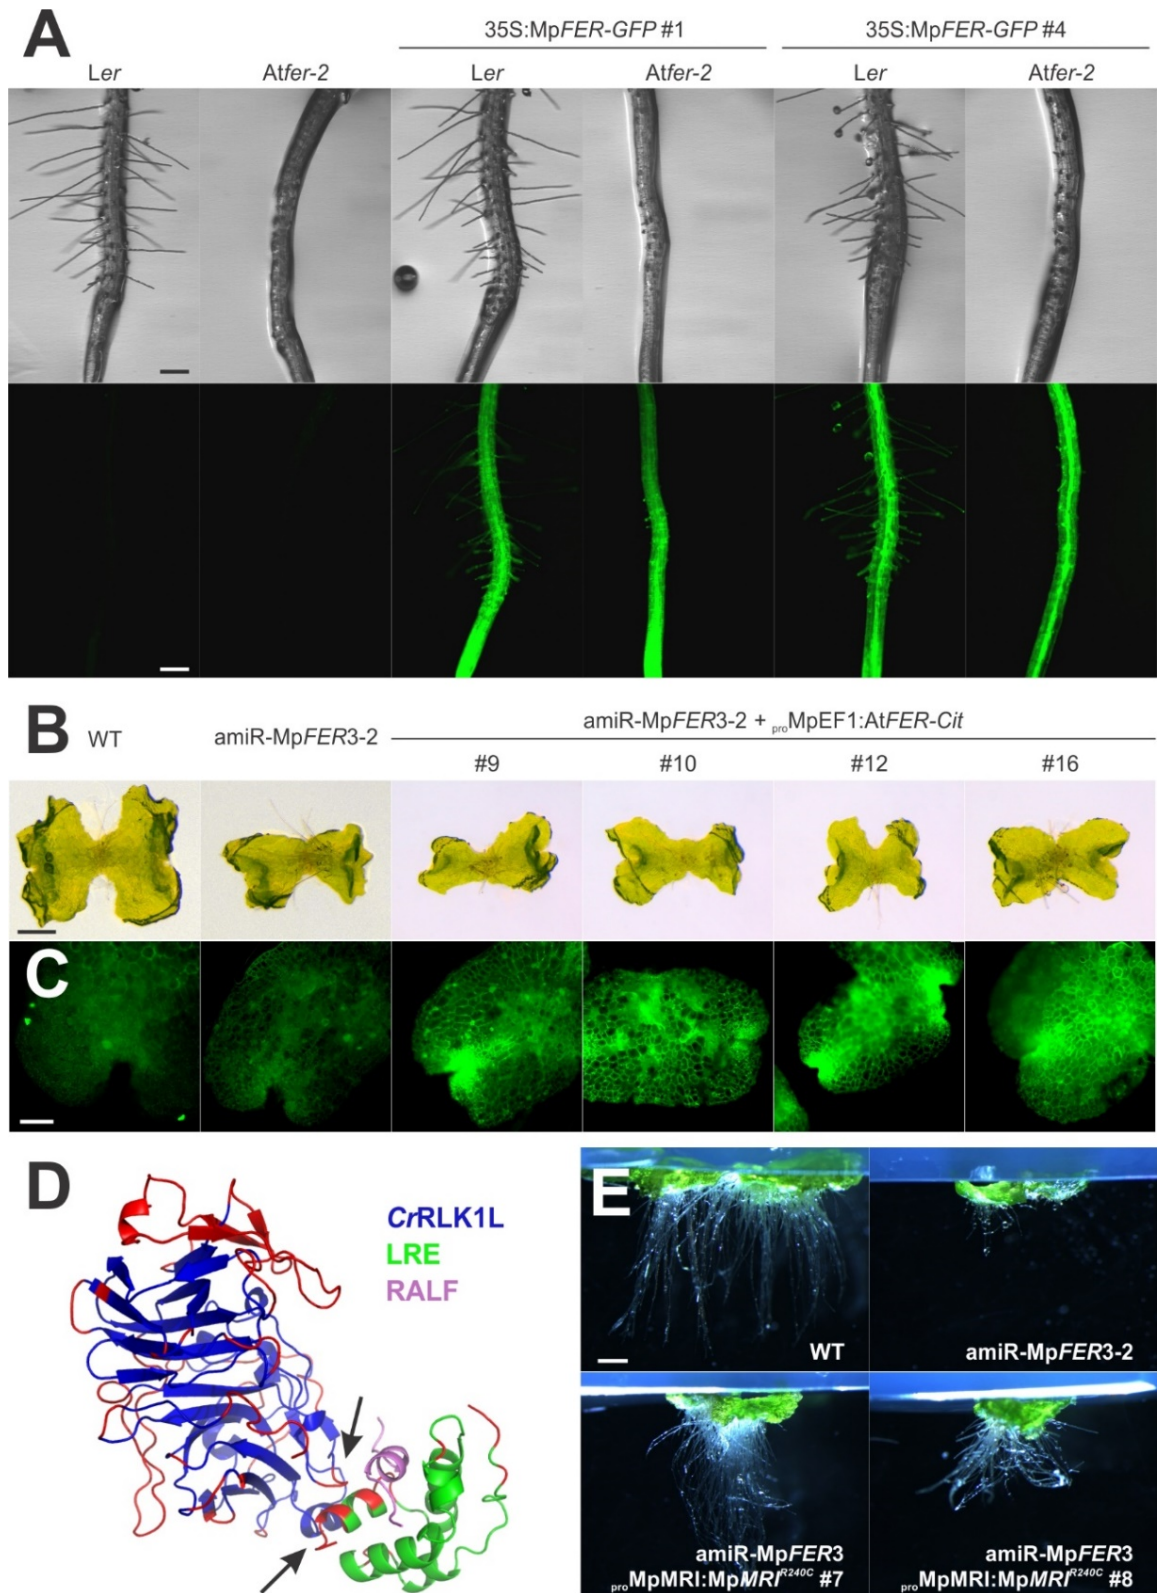

1282

1283

1284 **Figure 6. Interspecific Complementation of *A. thaliana* and *M. polymorpha* Plants**

1285 **with Reduced Levels of *FER* Activity**

1286 (A) Roots of independent *A. thaliana* lines expressing 35S:MpFER-GFP in Ler wild-type  
1287 (WT) and *Atfer-2* plants. Scale bar, 200  $\mu$ m.

1288 (B) 10-day old gemmalings of WT and amiR-MpFER3-2 *M. polymorpha* plants with and  
1289 without expression of *AtFER-Cit*. Scale bar, 0.5 mm.

1290 (C) Citrine expression in 7-day old gemmalings of WT and amiR-MpFER3-2 plants with  
1291 and without expression of *AtFER-Cit*. Scale bar, 100  $\mu$ m.

1292 (D) Cartoon representation of the structural conservation of the CrRLK1L<sup>ECD</sup>/LRE/RALF  
1293 complex by comparing AtFER/MpFER and AtLLG2/MpLRE1. Blue and green represent  
1294 spatially highly conserved regions of CrRLK1L and LRE homologs, respectively. Red  
1295 indicates structural regions with low spatial conservation, lilac the C-terminal part of  
1296 AtRALF23, and black arrows the interaction regions of the three proteins.

1297 (E) Complementation of amiR-MpFER lines with a dominant-active version of MpMRI  
1298 under its own promoter (*proMpMRI:MRI<sup>R240C</sup>*). Scale bar, 1 mm.

1299 See also Figures S4-S7

1300



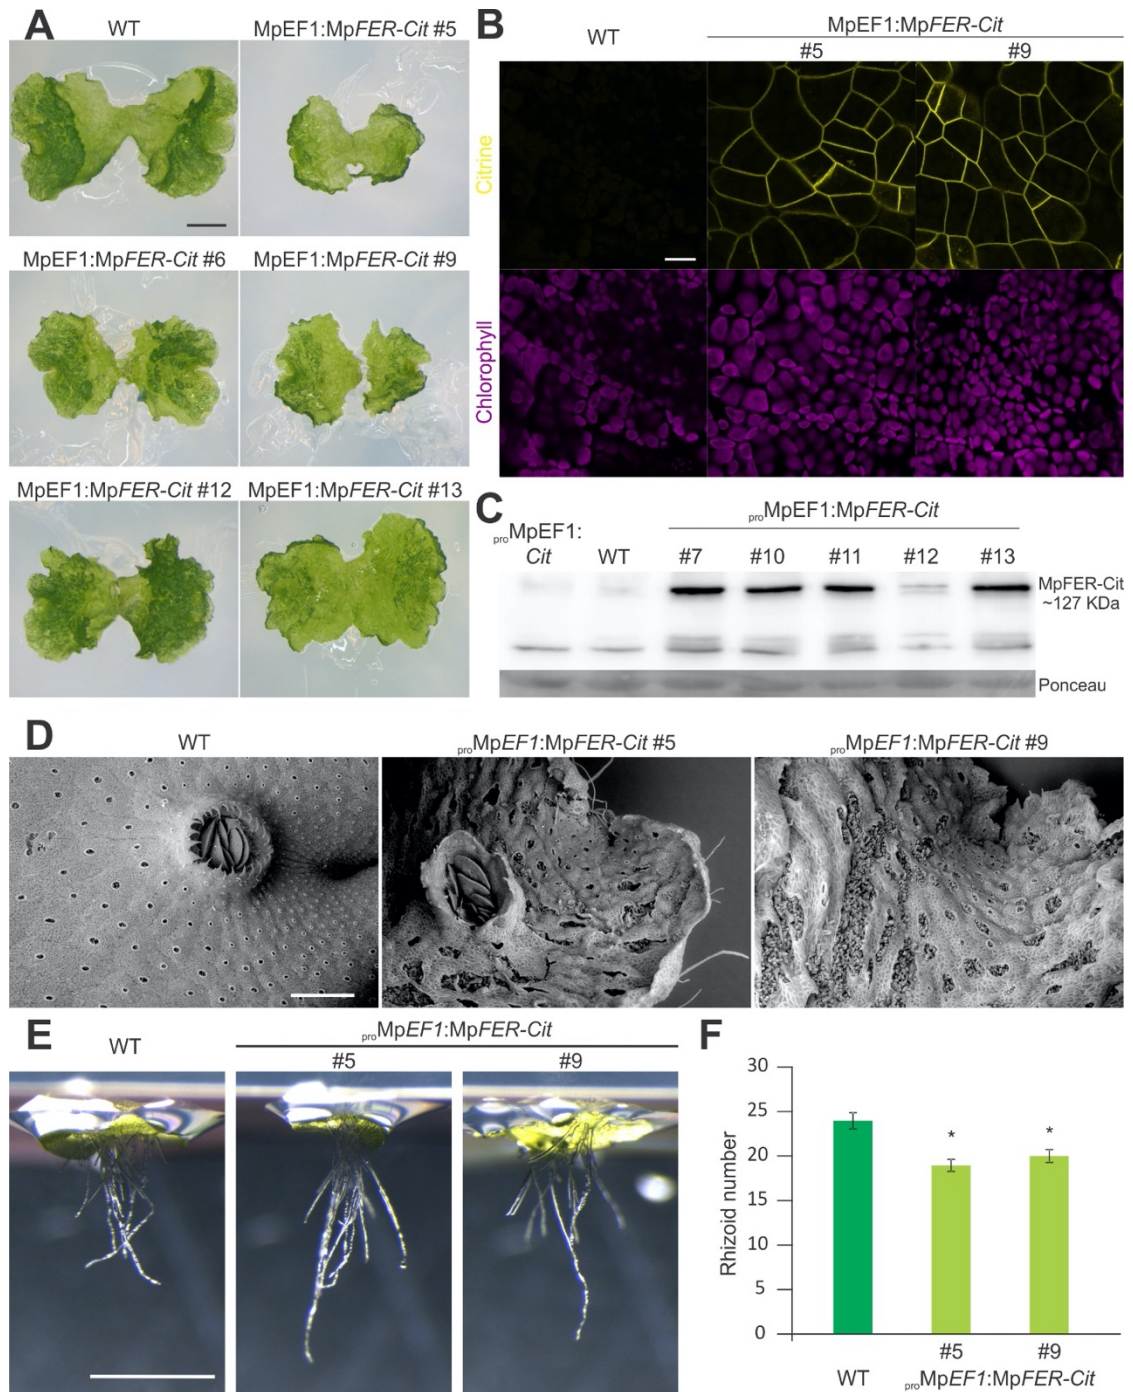

1301

1302

1303 **Figure 7: Overexpression of MpFER Affects Morphological Integrity**

1304 (A) Representative pictures of 10-day old gemmalings of wild-type (WT, Tak1) and  
1305 different lines overexpressing MpFER (*proMpEF1:MpFER-Cit*). Scale bar, 1 mm.

1306 (B) Citrine expression at the plasma membrane in WT and *proMpEF1:MpFER-Cit* lines #5  
1307 and #9 as observed under confocal microscopy. Scale bar, 20  $\mu$ m.

1308 (C) Western blot analysis of *proMpEF1:MpFER-Cit* lines using an anti-GFP antibody.  
1309 *proMpEF1:Cit* and WT lines were used as positive and negative controls, respectively. The  
1310 Ponceau membrane staining of the most intense band at 55 kDa (presumably Rubisco)  
1311 was used as a loading control.

1312 (D) Scanning electron microscopical images of thalli from 20-day old plants of WT and  
1313 *proMpEF1:MpFER-Cit* lines #5 and #9. Scale bar, 500  $\mu$ m.

1314 (E) Representative pictures of 3-day old gemmalings growing in upside-down plates of  
1315 WT and *proMpEF1:MpFER-Cit* lines #5 and #9. Scale bar, 1 mm.

1316 (F) Number of rhizoids in 3-day old gemmalings of WT and *proMpEF1:MpFER-Cit* lines #5  
1317 and #9. n = 30.

1318 See also Figure S6

1319

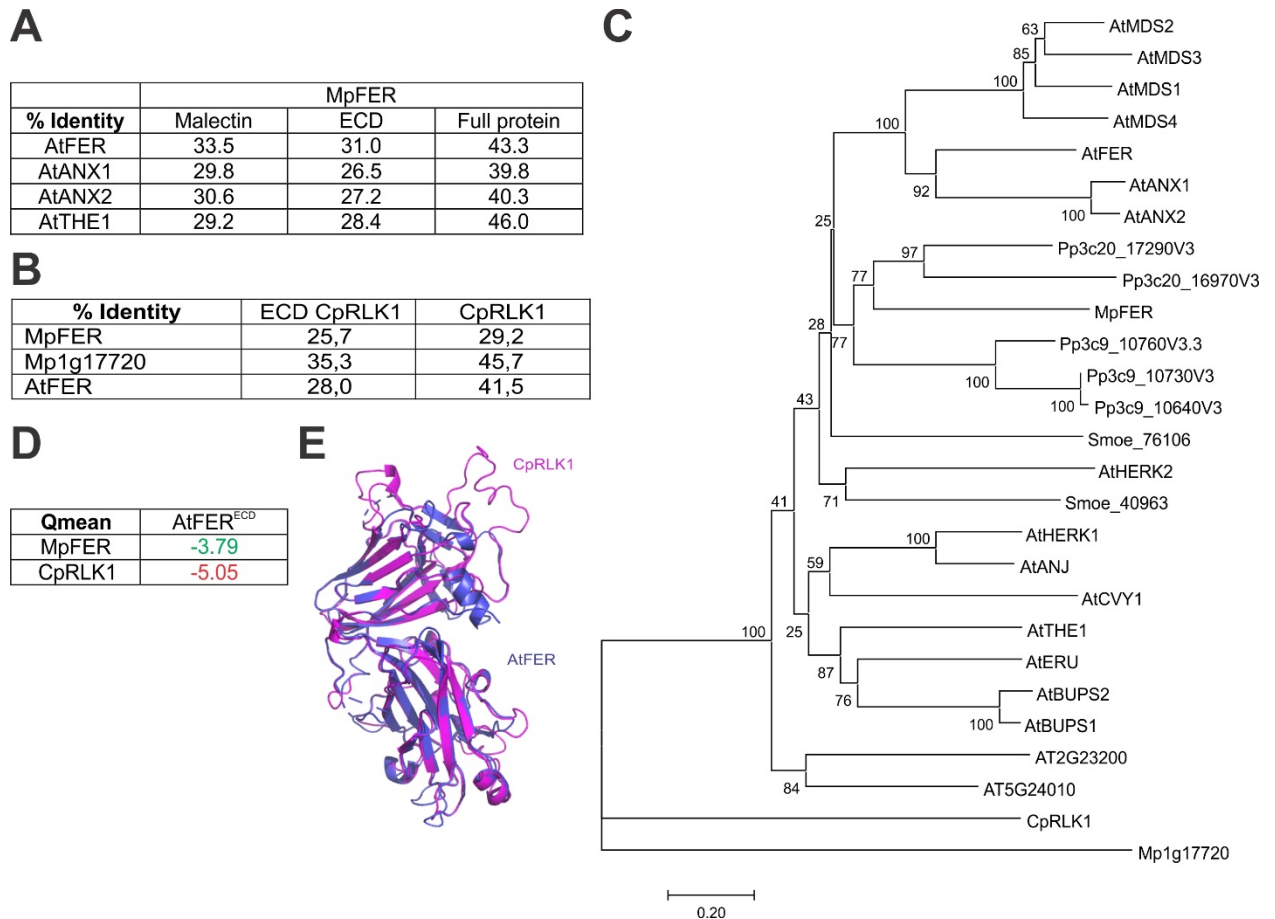

1320

1321 **Figure S1. The CrRLK1L Family Appeared together with Land Plants. Related to**  
 1322 **Figure 1.**

1323 (A) Percentage of identity of the malectin-like domain, the complete ECD, and the full  
 1324 protein of MpFER with AtFER, AtANX1, AtANX2, and AtTHE1.

1325 (B) Percentage of identity of the ECD and full protein of CpRLK1 with MpFER, AtFER,  
 1326 and Mapoly001s0111.

1327 (C) A rooted neighbor-joining tree of the amino acid sequence of the predicted malectin-  
 1328 like domain was generated using ClustalW. CrRLK1L members from *Marchantia*  
 1329 *polymorpha* (Mp), *Physcomitrella patens* (Pp), *Selaginella moellendorffii* (Smoe), and  
 1330 *Arabidopsis thaliana* (At) were used. Algal CpRLK1 and Mapoly001s0111 were also  
 1331 included. The numbers indicate the bootstrap values (%) from 1000 replications. The  
 1332 given scale represents a substitution frequency of 0.1 amino acids per site.

1333 (D) Qmean value for prediction of MpFER or CpRLK1 3D structures of the ECD based  
1334 on the AtFER ECD. Green numbers indicate a good modelling fit, red numbers indicates  
1335 a bad modelling fit.

1336 (E) Structural superposition of the ECD of AtFER (blue) and CpRLK1 (purple).

1337

**A** *MpmiR160* Mp1g26670  
 GCACCTCCTCTCTCCGACTGCAGCCCGTTTTTCGAGATCCGAGGACTTGCTCGACGCGACTAATTGGGGAGGCCAGACTG  
 CACTT**GGCTGGCTCCCTGTATGCCA**ACTGAGGAGCTCCTCAGAGACCTTGACAGGCTCCGTAGCTGGCATT**CAGGGG**  
**CCATGCAGGAGGAAGTCGCTACCTCCCGCAAGGTGCGACTAGCTTTCTGTCTTGGGTGCACACCTCACTGATGTTTGA**  
 TAGATTTACTTA

amiR-Mp*FER1*  
**TGCAAGCTT**GCACCTCCTCTCTCCGACTGCAGCCCGTTTTTCGAGATCCGAGGACTTGCTCGACGCGACTAATTGGGGAG  
 GCCAGACTGCACT**TGACGTAGGCAA**ACT**TGT**CGAACTGAGGAGCTCCTCAGAGACCTTGACAGGCTCCGTAGCT**CGAC**  
**ATGTTTGTCTACCTCAGGAGGAAGTCGCTACCTCCCGCAAGGTGCGACTAGCTTTCTGTCTTGGGTGCACACCTCACT**  
 GATGTTT**GATAGATTTACTTAGGATCCATA**

amiR-Mp*FER2*  
**TGCAAGCTT**GCACCTCCTCTCTCCGACTGCAGCCCGTTTTTCGAGATCCGAGGACTTGCTCGACGCGACTAATTGGGGAG  
 GCCAGACTGCACT**TCGATGTCGAAAATCCAGGTG**ACTGAGGAGCTCCTCAGAGACCTTGACAGGCTCCGTAGCT**CCACCT**  
**GCATTTTTGACAACGAGGAGGAAGTCGCTACCTCCCGCAAGGTGCGACTAGCTTTCTGTCTTGGGTGCACACCTCACT**  
 GATGTTT**GATAGATTTACTTAGGATCCATA**

amiR-Mp*FER3*  
**TGCAAGCTT**GCACCTCCTCTCTCCGACTGCAGCCCGTTTTTCGAGATCCGAGGACTTGCTCGACGCGACTAATTGGGGAG  
 GCCAGACTGCACT**TCGAACTTCCTCAGAGACTC**ACTGAGGAGCTCCTCAGAGACCTTGACAGGCTCCGTAGCT**GAGTC**  
**TGTGAGGGAGTTGGGAGGAGGAAGTCGCTACCTCCCGCAAGGTGCGACTAGCTTTCTGTCTTGGGTGCACACCTCACT**  
 GATGTTT**GATAGATTTACTTAGGATCCATA**

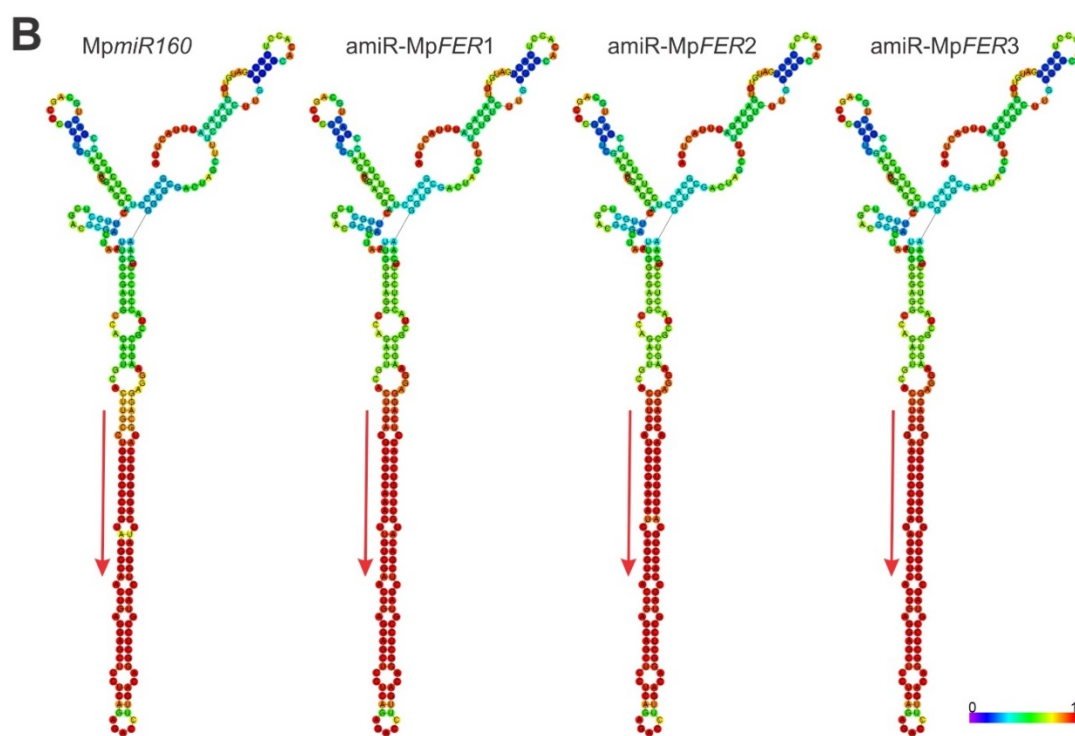

**Figure S2. Design of amiR-Mp*FER* Precursors. Related to Figure 3.**

(A) *MpmiR160* (Mapoly0002s0211, Mp1g26670) and amiR-Mp*FER1*, amiR-Mp*FER2*, and amiR-Mp*FER3* sequences. miRNA sequences are in red and miRNA\* in blue. Cloning sequences from amiR-Mp*FER* constructs are in bold.

1344 (B) Drawing of the minimum free energy structure of *MpmiR160* and *amiR-MpFER3*  
1345 constructs predicted by the RNAfold web server ([http://rna.tbi.univie.ac.at/cgi-](http://rna.tbi.univie.ac.at/cgi-bin/RNAWebSuite/RNAfold.cgi)  
1346 [bin/RNAWebSuite/RNAfold.cgi](http://rna.tbi.univie.ac.at/cgi-bin/RNAWebSuite/RNAfold.cgi)). Red arrows indicate location and orientation of the  
1347 mature miRNA in the precursor. The structures are colored by base-pairing probabilities;  
1348 for unpaired regions the color denotes the probability of being unpaired.  
1349



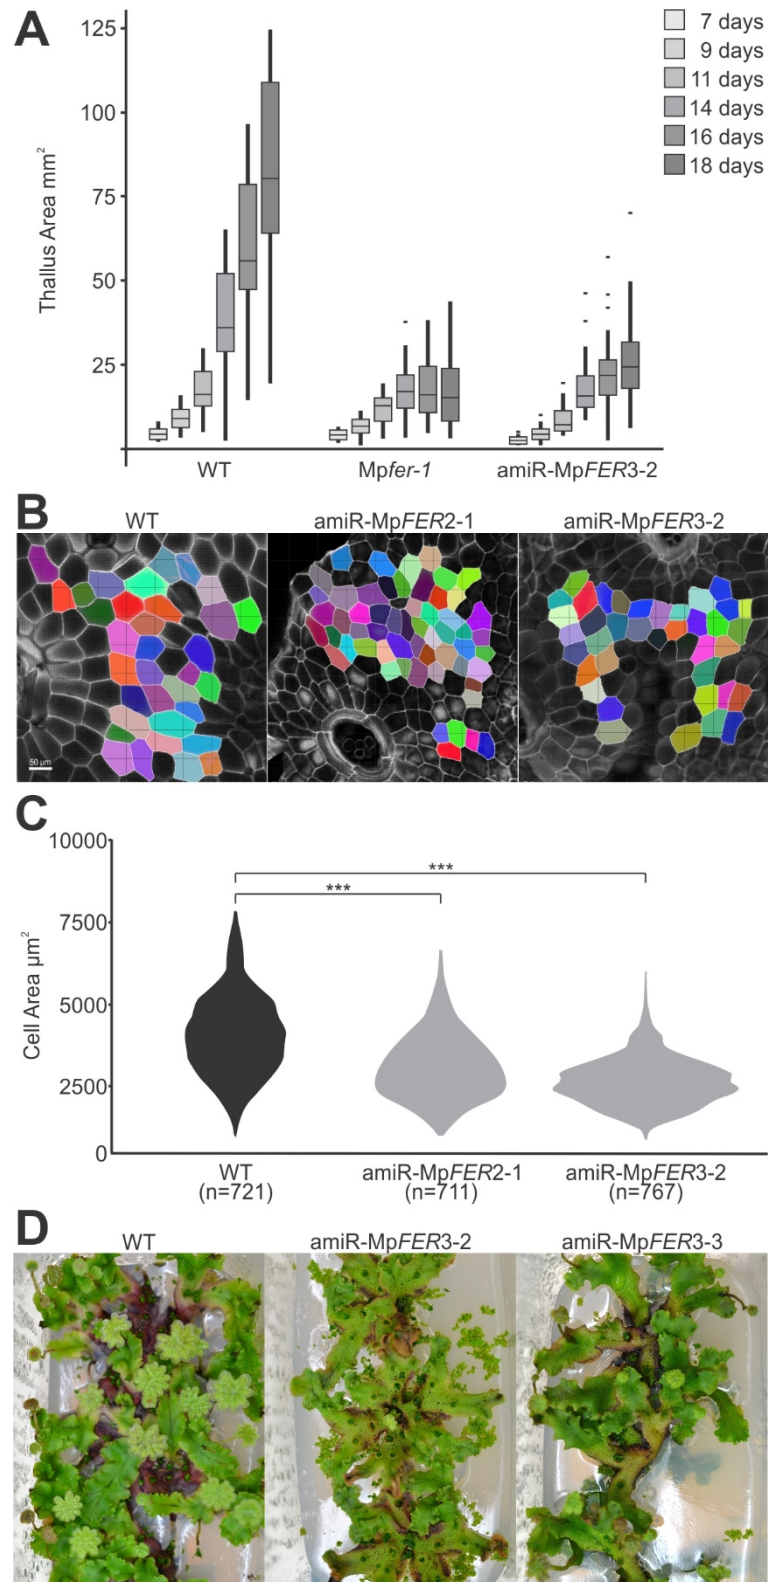

1350

1351

1352 **Figure S3. Reduction in Thallus and Cell Area in Plants with Reduced MpFER**

1353 **Levels. Related to Figures 3 and 5.**

1354 (A) Thallus area of wild-type (WT), *Mpfer-1*, and *amiR-MpFER3-2* plants at different days  
1355 after putting gemmae on plates.  $n = 30$ , outliers are indicated as black dots. Areas were  
1356 estimated using ImageJ software.

1357 (B) Representative images from cell surface areas measured in WT, *amiR-MpFER2-1*,  
1358 and *amiR-MpFER3-2* plants. Scale bar,  $50 \mu\text{m}$ .

1359 (C) Difference in cell size between WT, *amiR-MpFER2-1*, and *amiR-MpFER3-2* plants is  
1360 significant ( $p < 0.001$ ) based on the nonparametric Kruskal-Wallis test and a linear  
1361 regression model with a highly significant interaction ( $p < 0.001$ ).

1362 (D) Induction of antheridiophores in WT and two independent *amiR-MpFER3* lines. Three  
1363 plants were grown in each sterile plastic box under far-red light induction.

1364



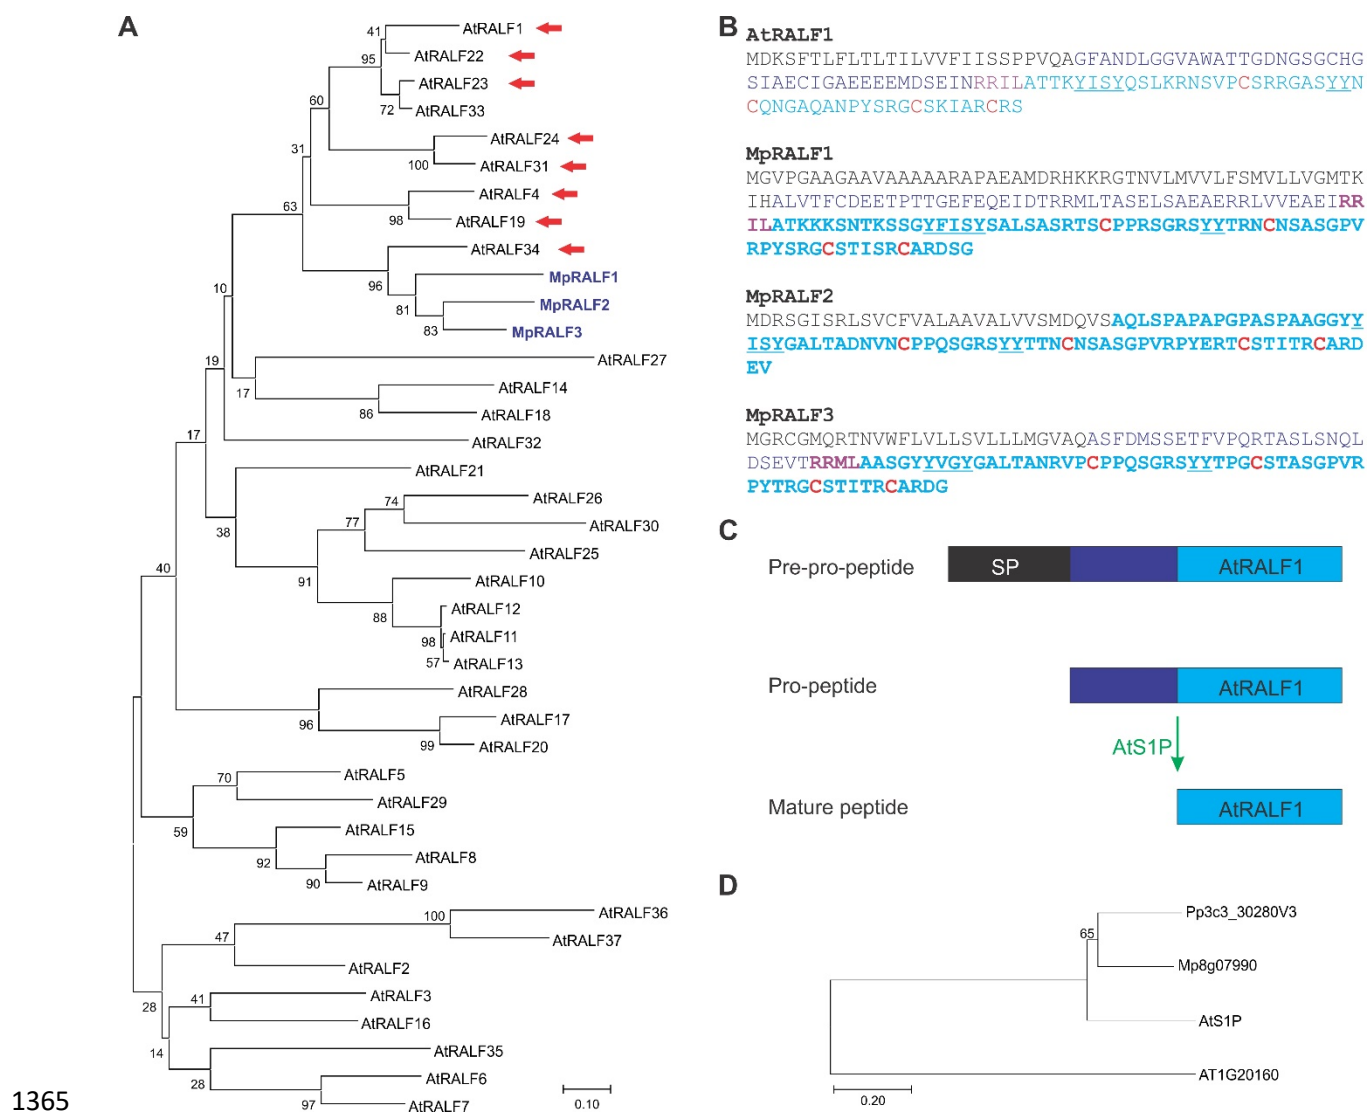

1365

1366

1367 **Figure S4. MpRALF Peptides Belong to the AtRALF1-clade of the RALF Family.**

1368 **Related to Figure 6.**

1369 (A) A rooted neighbor-joining tree of the amino acid sequence of the predicted mature

1370 RALF peptides was generated using ClustalW. RALF members from *M. polymorpha* and

1371 *A. thaliana* were used. Red arrows indicate RALFs that are known ligands of CrRLK1Ls.

1372 The numbers indicate the bootstrap values (%) from 1000 replications. The given scale

1373 represents a substitution frequency of 0.1 amino acids per site.

1374 (B) Amino acid sequence comparison of AtRALF1 and MpRALF1-3. Predicted signal  
1375 peptides are in black, predicted mature peptides in light blue, conserved Cys in red, and  
1376 predicted S1P recognition sites in violet.

1377 (C) Processing pathway AtRALF1 by the S1P protease.

1378 (D) A rooted neighbor-joining tree of the amino acid sequence of the S1P orthologs was  
1379 generated using ClustalW. S1P members from *M. polymorpha*, *P. patens*, and *A. thaliana*  
1380 were used. The numbers indicate the bootstrap values (%) from 1000 replications. The  
1381 given scale represents a substitution frequency of 0.1 amino acids per site.

1382

1383

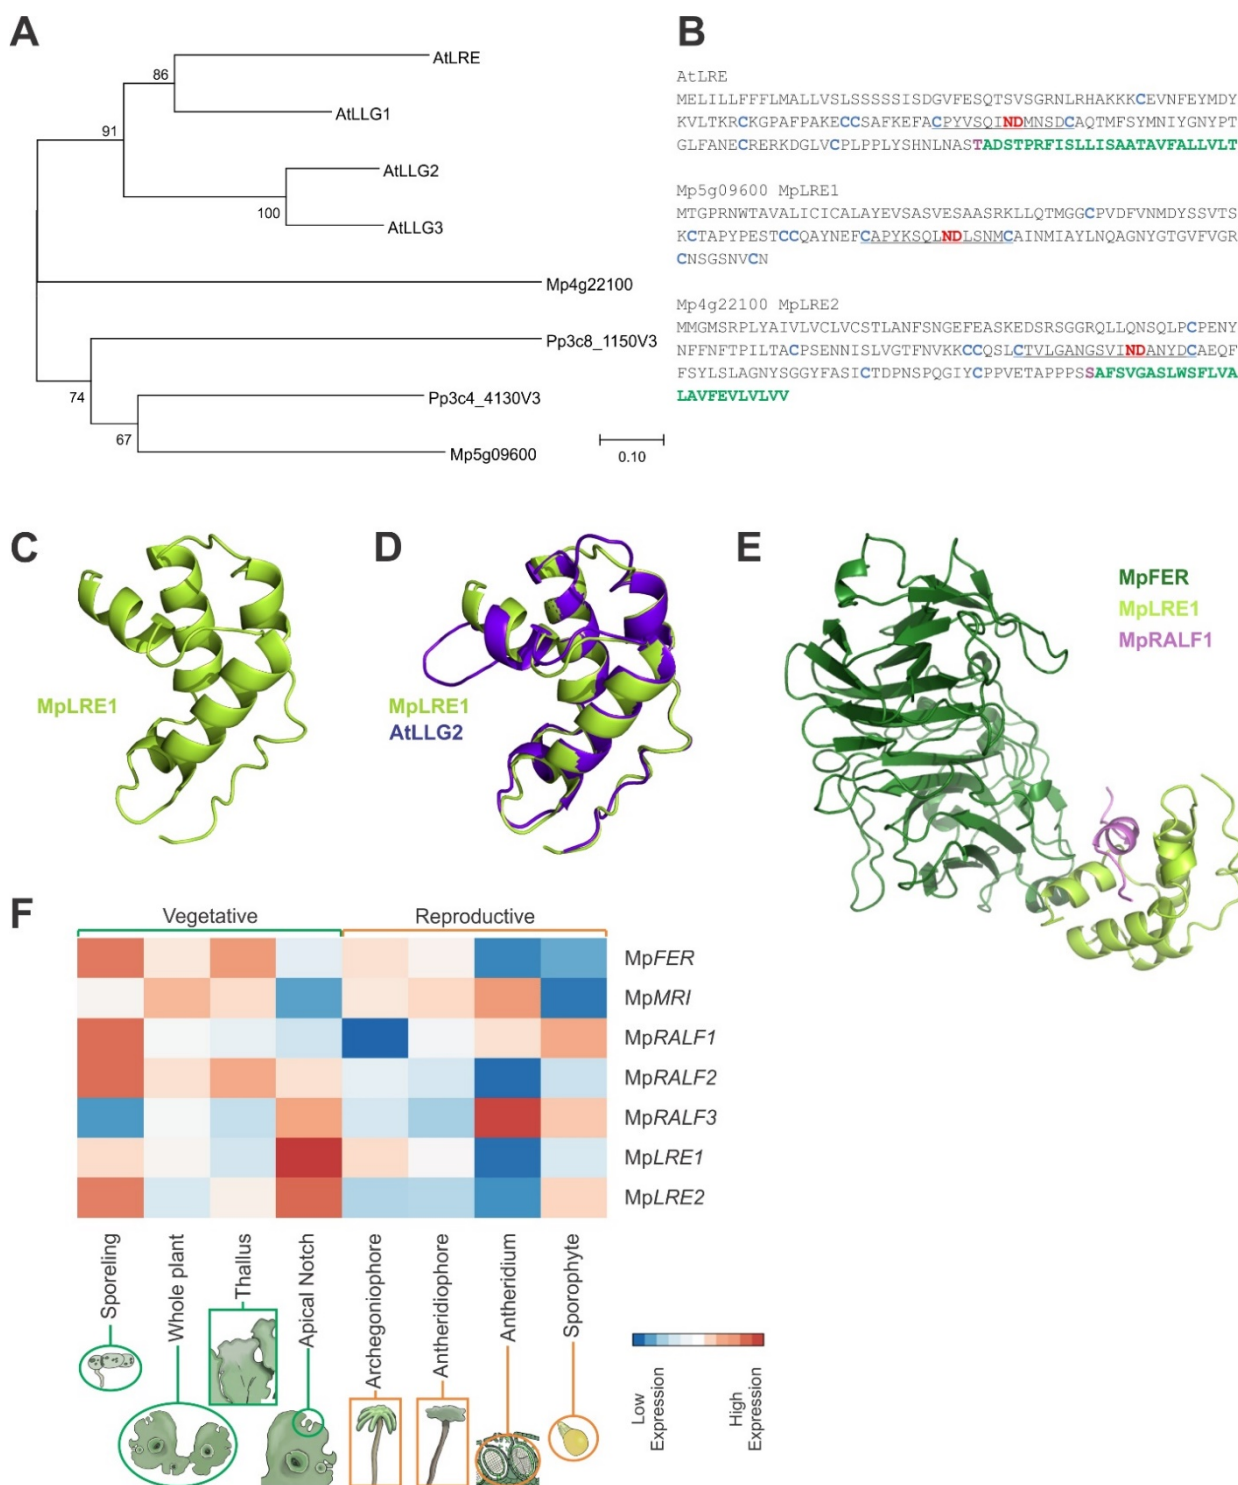

1384

1385

1386 **Figure S5. Two LORELEI-like Proteins Are Encoded in the *M. polymorpha* Genome.**

1387 **Related to Figure 6.**

1388 (A) A rooted neighbor-joining tree of the amino acid sequence of LRE orthologs was  
1389 generated using ClustalW. LRE members from *M. polymorpha*, *P. patens*, and *A. thaliana*  
1390 were used. The numbers indicate the bootstrap values (%) from 1000 replications. The  
1391 given scale represents a substitution frequency of 0.1 amino acids per site.

1392 (B) Amino acid sequence of AtLRE, MpLRE1, and MpLRE2. Conserved Cys are in light  
1393 blue, the ND motif in red, and the GPI-anchoring site in green.

1394 (C) Cartoon representation of the predicted 3-dimensional structure of MpLRE1, showing  
1395 predicted alpha-helices.

1396 (D) Structural superposition of AtLGG2 (blue) and MpLRE1 (green).

1397 (E) Cartoon representation of the predicted 3-dimensional structure of the  
1398 MpFER/MpLRE1/MpRALF1 complex, showing predicted alpha-helices and beta-sheets.

1399 (F) Heatmap depicting relative gene expression based on RNAseq data (row-Z-score of  
1400 vs normalized counts) of MpFER and the *M. polymorpha* orthologs of AtMRI, AtRALF1,  
1401 and AtLRE across different tissues. Vegetative and reproductive tissues are grouped by  
1402 green and orange, respectively. Averaged expression values are represented with colors  
1403 of increasing red and blue intensity indicating upregulation and downregulation of gene  
1404 expression, respectively.

1405

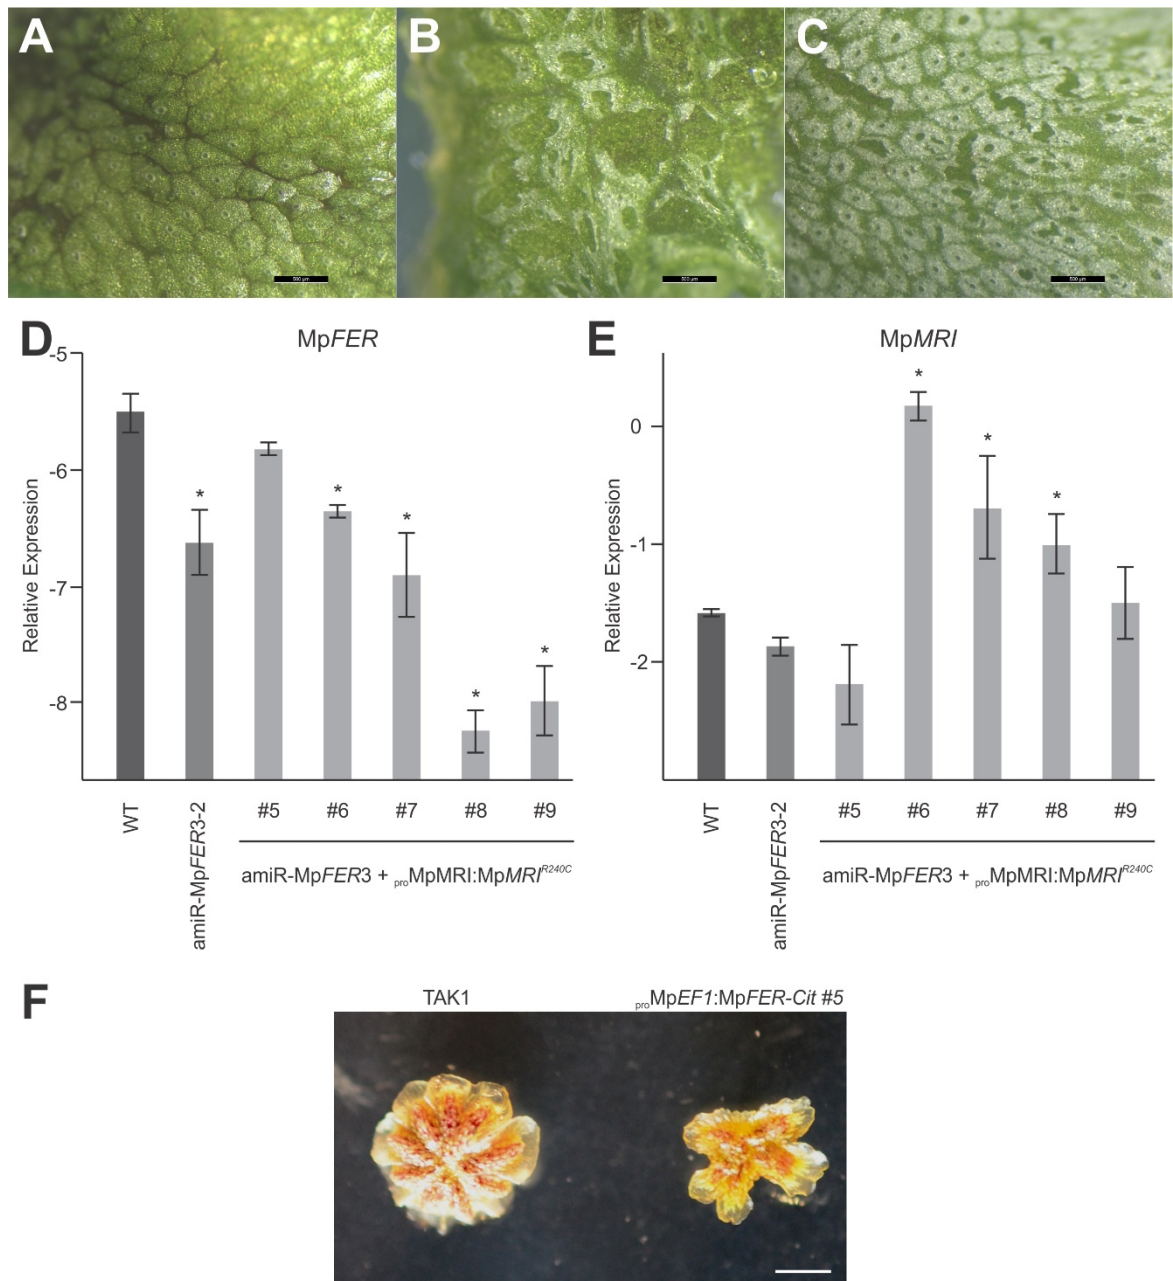

1406

1407

1408 **Figure S6. Expression of  $MpMRI^{R240C}$  Suppresses the Bursted Rhizoid Phenotype**

1409 **of  $amiR-MpFER3$  Lines but Leads to Aberrant Epidermis Development. Related to**

1410 **Figures 6 and 7.**

1411 (A to C) Epidemical pictures of thalli from the wild-type (WT, Tak-1) (A), and amiR-  
1412 Mp*FER3* + *pro*MpMRI:MpMRI<sup>R240C</sup> lines #6 (B) and #8 (C), which both partially suppressed  
1413 the bursting rhizoid phenotype (Fig. 6).

1414 (D and E) Relative expression of Mp*FER* (D) and MpMRI (E) against the geometric mean  
1415 of the reference genes Mp*ACT1*, Mp*ACT7*, and Mp*APT3* in WT, amiR-Mp*FER3-2*, and 5  
1416 lines (#5 to #9) co-transformed with the amiR-Mp*FER3-2* and *pro*MpMRI:MpMRI<sup>R240C</sup>  
1417 constructs. Expression levels of three biological replicates were assessed by droplet  
1418 digital PCR (ddPCR). The y-axis corresponds to the log<sub>2</sub>-ratio between the test and the  
1419 geometric mean of the reference genes. Shown are means ± SEMs of three biological  
1420 replicates. \*P < 0.01, one-way ANOVA.

1421 (F) Representative images of the antheridial receptacle of WT and *pro*Mp*EF1*:Mp*FER-Cit*  
1422 plants. Scale bar, 2 mm.

1423



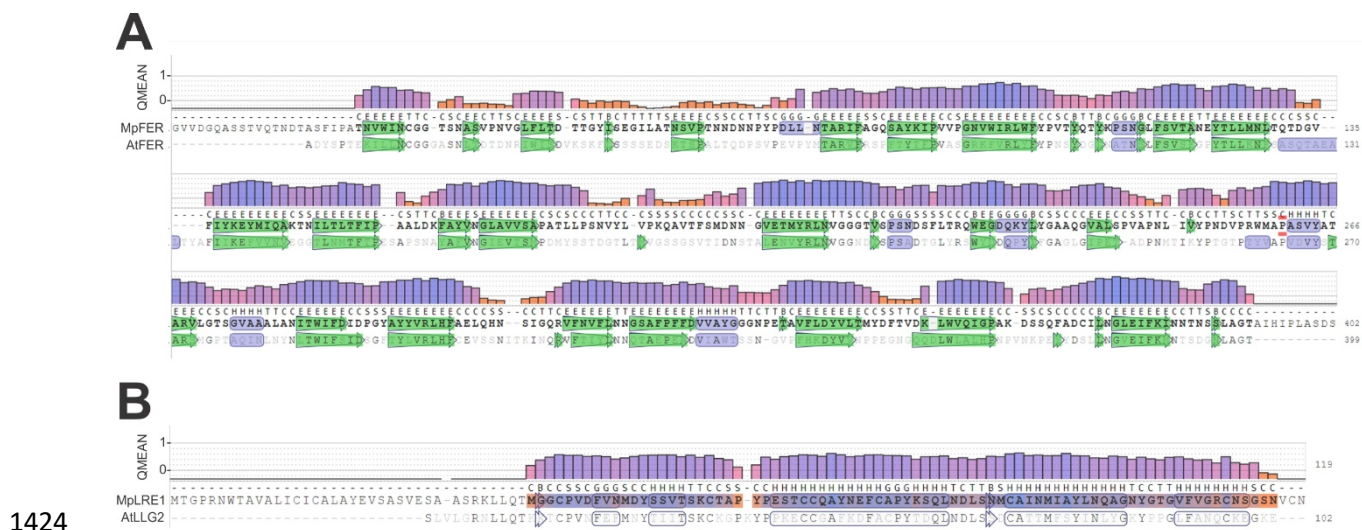

**Figure S7. Structure Assessment and Quality Estimations of the MpFER and MpLRE 3-dimensional Models. Related to Figure 6.**

QMEAN score barplot indicating quality estimates of the predicted models, across their aminoacidic sequence. Below the barplots, the corresponding secondary structures are displayed for both target and template sequences, with alpha-helices represented by light purple boxes and beta-sheets by green arrows. All plots were adapted from the model report produced by the SWISS-MODEL workspace.

(A) MpFER<sup>ECD</sup>, for which AtFER was used as a template (PDB 6a5b.1A).

(B) MpLRE1, for which AtLLG2 was used as a template (PDB 6a5d.1A).
